1 **Title: Patients with sickle cell disease presented dysregulated plasma Rb/K ratio and Gamma-**  
2 **glutamyl cycle in red blood cells**

3  
4 **Author (s): Shruti Bhatt<sup>1</sup>, Amit Kumar Mohapatra<sup>2</sup>, Apratim Sai Rajesh<sup>3,#</sup>, Satyabrata Meher<sup>4</sup>,**  
5 **Pradip Kumar Panda<sup>5</sup>, Ranjan Kumar Nanda<sup>2\*</sup> and Suman Kundu<sup>1,6\*</sup>**

6  
7 <sup>1</sup>Department of Biochemistry, University of Delhi South Campus, New Delhi 110021, India

8 <sup>2</sup>Translational Health Group, International Centre for Genetic Engineering and Biotechnology, New  
9 Delhi 110067, India

10 <sup>3</sup>Department of Biosciences and Biotechnology, Fakir Mohan University, Balasore 756019, India

11 <sup>4</sup>Multi-disciplinary Research Unit, Veer Surendra Sai Institute of Medical Science and Research, Burla,  
12 Sambalpur, Odisha, 768017, India

13 <sup>5</sup>Sri Sri College of Ayurvedic Science and Research, Sri Sri University, Cuttack, Odisha 753015, India

14 <sup>6</sup>Department of Biological Sciences, Birla Institute of Technology and Science Pilani, K.K.Birla Goa  
15 Campus, Goa 403726, India

16  
17 **\*Correspondence:**

18 Suman Kundu, BITS Pilani, K.K.Birla Goa Campus, Goa 403726 and University of Delhi South  
19 Campus, New Delhi 110021, India;

20 Telephone No: +91-832-2580101

21 Email address: [suman.kundu@south.du.ac.in](mailto:suman.kundu@south.du.ac.in); [skundu@goa.bits-pilani.ac.in](mailto:skundu@goa.bits-pilani.ac.in);

22 Ranjan Kumar Nanda, Translational Health Group, International Centre for Genetic Engineering and  
23 Biotechnology, New Delhi 110067, India

24 Email address: [ranjan@icgeb.res.in](mailto:ranjan@icgeb.res.in)

25  
26 <sup>#</sup>Present affiliation: COVID-19 laboratory, Department of Microbiology, Veer Surendra Sai Institute of  
27 Medical Science and Research, Burla, Sambalpur, Odisha, 768017, India

28  
29  
30 **Running title: RBC metabolome in sickle cell disease**

31  
32  
33  
34  
35  
36  
37  
38

39 **Abstract**

40

41 Patients suffering from sickle cell disease (SCD) present with multifactorial pathology, and a  
42 detailed understanding of it may help to develop novel therapeutics. In this study, the plasma  
43 elemental ( $^{24}\text{Mg}$ ,  $^{44}\text{Ca}$ ,  $^{57}\text{Fe}$ ,  $^{63}\text{Cu}$ ,  $^{66}\text{Zn}$ ,  $^{77}\text{Se}$ ,  $^{85}\text{Rb}$ ,  $^{208}\text{Pb}$ , and  $^{39}\text{K}$ ) levels of SCD patients  
44 (n=10, male: 50%) and control groups (trait and healthy; n=10 each; male: 50%) were profiled  
45 using inductively coupled plasma mass spectrometry (ICP-MS). Additionally, comparative  
46 global erythrocyte metabolomics of SCD (n=5, male:100%) and healthy controls (n=5,  
47 male:100%) were carried out using liquid chromatography-mass spectrometry (LC-MS). SCD  
48 patients had higher plasma  $^{24}\text{Mg}$ ,  $^{44}\text{Ca}$ ,  $^{66}\text{Zn}$ ,  $^{208}\text{Pb}$ , and  $^{39}\text{K}$  levels and lower levels of  $^{57}\text{Fe}$ ,  
49  $^{77}\text{Se}$ , and  $^{85}\text{Rb}$  compared to controls. These changes in elemental levels, with a decreased Rb/K  
50 ratio in the SCD group, may explain the observed frequent hemolysis and severe dehydration  
51 with oxidative stress in patients. Mass spectrometry analysis of red blood cells (RBCs of SCD  
52 (n=5) and healthy controls (n=5) identified 442 unique metabolic features which separately  
53 clustered both the study groups in principal component analysis (PCA). A set of 136 features  
54 showed differential ( $p < 0.05$ ;  $\log_2$ fold change  $> \pm 1$ ) regulation and was involved in D-  
55 glutamine/D-glutamate, sphingolipid, arginine biosynthesis, glutathione and glycine, serine  
56 and threonine metabolism. Interestingly, higher pyroglutamic acid levels were observed in the  
57 sickle shaped-RBCs indicating a perturbed gamma-glutamyl pathway in SCD patients.  
58 Supplementation of the depleted trace metals and targeting the perturbed metabolic pathways  
59 in the RBCs of SCD patients may provide avenues for the development of alternate  
60 therapeutics.

61

62 **Key words:** sickle cell disease; metabolomics; ionomics; red cells; oxidative stress; mass spectrometry.

63

64

65

66

67

68

69

70

71

72

73

74

75

76

77

78

79

80

81

82

83

84

85

86

87

88

89  
90  
91  
92

Graphical abstract

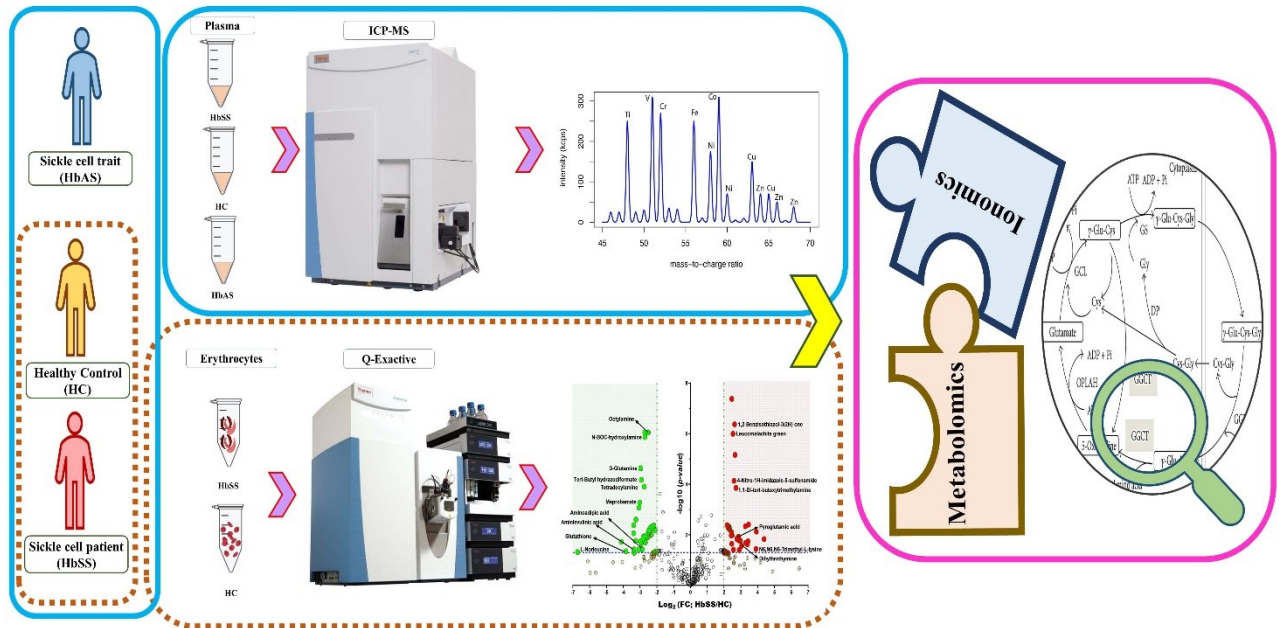

93  
94  
95  
96  
97  
98  
99  
100  
101  
102  
103  
104  
105  
106  
107  
108  
109  
110  
111  
112  
113

## 114 1. Introduction

115

116 WHO has recognized sickle cell disease (SCD), the first known human molecular disorder, as  
117 a global health pandemic. SCD cases are predicted to increase from 300,000 to 400,000 by  
118 2050 and the majority (2/3) of it was recorded in Africa and India [1-5]. SCD is caused by a  
119 genetic mutation that translates into the substitution of valine by glutamic acid, at the 6th  
120 position in the  $\beta$  chain of the hemoglobin molecule leading to a structural variant known as  
121 Hemoglobin S (HbS) [6-8]. HbS has a reduced oxygen affinity, and deoxygenation near tissues  
122 leads to exposure of hydrophobic sites on individual T-state HbS molecules [9].

123 Exposed hydrophobic sites act as a nucleus on the HbS molecule, aggregating and  
124 forming a 14 nm fiber leading to the sickle shaped RBCs (SS-RBCs). SS-RBCs block the blood  
125 vessels leading to an impaired blood supply to organs causing recurrent episodes of acute pain  
126 (vaso-occlusive crisis: VOC) and chronic damage leading to poor survival [10-14].  
127 Understanding the detailed pathophysiology of SCD at the molecular and elemental level will  
128 be useful to identify targets for better clinical management [15].

129 Multi-omics studies using liquid chromatography and inductively coupled plasma mass  
130 spectrometry (LC-MS/ICP-MS) are useful to capture the metabolites and elemental details to  
131 better understand the disease pathophysiology. Several metabolomic studies have advanced  
132 our understanding of various disease pathobiology and have become backbone for the  
133 development of alternative therapeutics [16]. Metabolite profiling deciphered that enhanced  
134 ADORA2B signaling led to increased plasma adenosine levels, contributing to multiple SCD-  
135 related complications [17]. It also captured an enhanced level of circulating sphingosine-1-  
136 phosphate (S1P), a bioactive lipid, in both SCD mice and humans [18]. The Sphk1-led S1P  
137 increase reprogrammes the metabolic balance via the release of glycolytic enzymes in the  
138 cytosol [19], towards the Embden Meyerhoff pathway (EMP) rather than the Hexose  
139 monophosphate pathway (HMP) [20]. The metabolic switching induces sickling via elevated  
140 production of 2,3-BPG (2, 3 biphosphoglycerate) [21], signals inflammation and tissue  
141 damage via the S1PR1 (S1P receptor 1) receptor on immune cells (myeloid lineage) [22]. A  
142 dysregulated Land's cycle, evident from increased lysophosphatidylcholine and arachidonic  
143 acid levels in SS-RBC, was reported using comparative blood metabolomic profiling of Sickle-  
144 Tg mice [23]. Interestingly, these few unbiased metabolic analyses have delivered a massive  
145 thrust to in-vitro, pharmacological, preclinical and human studies targeting the ADORA2B and  
146 SphK1–S1P–S1PR1–IL-6 signaling cascades to decipher alternative therapeutic strategies  
147 [24]. For example, PEG-ADA (adenosine deaminase deficiency), a clinically relevant drug used  
148 to treat ADA-deficient patients, reduced elevated adenosine levels, sickling, splenomegaly,  
149 multiple tissue damage, and pain [17]. Alternatively, a decrease in adenosine production can  
150 be achieved via CD73 inhibitor [e.g., adenosine 5'-( $\alpha,\beta$ -methylene) diphosphate], reduced  
151 sickling and multiple organ damage [25].

152 Similarly, a molecular antagonism of ADORA2B and SphK1 by PSB1115 and PF543,  
153 respectively, potently decreases sickling, inflammation and pain [26, 27]. However, only a  
154 fraction of these limited studies explored the metabolic profile of SS-RBCs derived from SCD  
155 patients [28-30]. Most have been performed on erythrocytes derived from cultured human  
156 RBCs and SCD-transgenic mice. Additionally, the previous studies fall short of capturing  
157 comprehensive pathological effects of sickle cell haplotypes including Senegal (SEN), Benin  
158 (BEN), Bantu or Central African Republic (CAR), Cameroon (CAM) and Arab-Indian  
159 (ARAB/AI) that represent the ethnic group or geographical region from which patients  
160 originated. To the best of our knowledge, no such investigation has been reported for Indian  
161 SCD diaspora. Thus, it would be interesting to investigate metabolic fingerprint of SS-RBCs  
162 (primarily Arab-Indian haplotype).

163 Furthermore, it has been repeatedly pressed that multi-omics can supplement and  
164 support pathophysiological understanding of various physiological stress [31]. Morphological,  
165 biochemical and metabolic changes/alterations induced by multiple pathological conditions  
166 can be correlated to the alterations in the concentration of elements in biofluids. The most  
167 notable example links RBC clearance with intracellular calcium levels [32, 33]. However, few  
168 studies establish the impact of stressors on the homeostatic loss of ions associated with SCD  
169 [34-36]. Inductively-coupled plasma mass spectrometry (ICP-MS) is a recent evolution of a  
170 decades-old analytical technique to measure elements at trace levels in biological fluids [37].

171 Thus, sparse and restricted reports on the perturbed metabolic pathways in RBCs and  
172 plasma elemental levels in SCD patients forged an exciting research avenue to be explored [29,  
173 38-40]. In this study, a comparative plasma elemental composition was monitored between  
174 SCD and control (traits and healthy) groups and global RBC metabolome profiling between  
175 SCD and healthy controls was performed. This study provides an unique opportunity to  
176 integrate metabolomic and ionic fingerprints to understand dysregulated metabolic  
177 pathways and identify markers associated with SCD. The lack of validated biomarkers for SCA  
178 severity represents a void in the state of knowledge of SCD that creates a critical roadblock in  
179 the design of clinical trials, the development of novel therapies and the emergence of precision  
180 medicine for SCD patients.

181

## 182 **2. Materials and Methods**

### 183 **2.1 Ethics statement**

184 All participants provided informed consent before participating in the study. This study was  
185 approved by the Institutional Ethics Committee of Sri Sri University, Cuttack, Odisha  
186 (SSCASRH/IEC/006/21) and University of Delhi South Campus, Delhi, India  
187 (UDSC/IEC/2021/Project/5.10.2021/4). The human studies reported in this study abide by the  
188 Declaration of Helsinki principles.

### 189 **2.2 Study participants**

190 For this study, blood samples were collected from a cohort of ten adult SCD patients with  
191 hemoglobin SS (HbSS, n=10, male 50%) disease (Supplementary Table S1), sickle cell trait  
192 individuals (hemoglobin AS: HbAS, n=10, male 50%) and ten healthy adults (controls, HC,  
193 n=10, male 50%). Written informed consent was obtained from all patients and controls. All  
194 protocols and procedures were approved by institutional ethics committees of the collaborating  
195 institutes handling patient samples.

### 196 **2.3 Sample collection and processing**

197 For this study, blood samples were collected from SCD patients in EDTA with hemoglobin SS  
198 disease and healthy adults (controls). Complete blood count (CBC) determined the clinical  
199 profile of participants; cellulose electrophoresis, PCR, and HPLC are presented in  
200 Supplementary Tables 1 and 2. The participants were enrolled according to the approved  
201 inclusion and exclusion criteria with consent (S.1.2). The inclusion criteria were a confirmed  
202 diagnosis of sickle cell disease by HPLC. Individuals who had received a transfusion were  
203 excluded from the study. All patients were receiving analgesic treatments. Blood samples,  
204 taken from patients with SCD, were characterized by their sickling properties [41]. Blood tubes  
205 were then centrifuged at 2000 ×g for 10 min to separate the RBCs and plasma and were  
206 aliquoted into equal volumes (0.5 ml). Plasma samples were stored in a -80 °C freezer until  
207 analysis. Samples were processed according to a biphasic liquid-liquid extraction (LLE)  
208 protocol. Briefly, RBC metabolism was quenched by extracting metabolites into  
209 methanol/water/chloroform solvents.

#### 210 **2.3.1 Untargeted metabolite profiling of sickle RBCs**

211 The 0.5 ml aliquots of human donor erythrocytes (Sri Sri University) that had been pre-treated  
212 with heparin anti-coagulant were placed in 2.0 ml microcentrifuge tubes (MCT). After adding



213 internal standards, they were centrifuged at 1000 ×g and 4 °C for 2 min and then placed on ice  
214 while the supernatant was aspirated. The RBCs were washed twice with their resuspension in  
215 1x phosphate-buffered saline (PBS) through centrifugation, and finally the supernatant was  
216 aspirated to leave an RBC pellet. These wash cycles remove non-erythrocytic metabolites and  
217 other compounds that may still be present outside the cells; however, it also delays quenching,  
218 and might leave residual traces of phosphate salts.

### 219 **2.3.2 Metabolite extraction**

220 To the RBC pellet of each tube, 0.15 mL of ice-cold, ultrapure water (Milli-Q Millipore,  
221 Mississauga, Canada) was added to resuspend the erythrocytes. The tubes were first plunged  
222 into the dry ice for 30 seconds followed by 20 seconds of incubation in the water bath at 37 °C  
223 to quench metabolism and lyse the cells. After quenching with dry ice, 0.6 ml of methanol at  
224 20 °C temperature was added, and the tubes were then vortexed to ensure complete mixing.  
225 The tubes were then plunged again into dry ice where 0.45 ml of chloroform was added to each  
226 tube. These tubes were vortexed briefly every 5 min for 30 min, and between each brief  
227 vortexing interval, they were placed in a cold bath. After 6 brief vortexes, the tubes were  
228 transferred to room temperature and 0.15 ml of ice-cold, ultrapure water (Milli-Q Millipore,  
229 Mississauga, Canada) was added to drive the phase separation between methanol and  
230 chloroform. The tubes were centrifuged at 1,000 ×g for 2 min at 4 °C so that a clear separation  
231 of the two phases could be observed above and below the compact disk of erythrocytes. After  
232 centrifugation, the tubes were transferred to a -20 °C freezer for an overnight incubation to  
233 allow residual chloroform to precipitate out of the aqueous methanol phase. The two liquid  
234 phases in each tube were transferred to separate 1.5 mL microcentrifuge tubes without  
235 disturbing the compact disk of erythrocytes or transferring any erythrocytes to the new tubes.  
236 The final volumes translated to a methanol/water/chloroform ratio of 4:2:3 for extraction and  
237 phase separation. The samples were then dried with speed-vac and resuspended in 0.2 mL LC  
238 mobile phase (97.9% ultra-pure water / 2% acetonitrile / 0.1% formic acid) [42].

### 239 **2.3.3 UPLC-Q-Exactive Plus Orbitrap MS/MS analysis**

240 All the samples were analyzed using an UHPLC system (UHPLC Dionex UltiMate® 3000,  
241 Dionex, Thermo Fisher Scientific, United States) that was controlled with Thermo Xcalibur  
242 software (Thermo Fisher Scientific, United States). The samples were separated using a  
243 Kinetex UPLC C18 column (100 × 2.1 mm, 1.9 μm; Phenomenex, Torrance, CA, United  
244 States). The mobile phase consisted of solvent A (0.1% formic acid) and solvent B (acetonitrile  
245 with 0.1% formic acid). Gradient elution was applied using the following optimized gradient  
246 program: A 35-min gradient at a flow rate of 0.3 ml/min with the following conditions was  
247 used for separation: 0–5 min, 1% B; 5–10 min, linear gradient from 1–3% B; 10–18 min, linear  
248 gradient from 3–40% B; 18–22 min, linear gradient from 40–80% B; 22–27 min, column  
249 cleaning at 95% B; and 27–35 min, re-equilibration at 1% B.

250 Mass spectrometry was performed on a Q-Exactive Plus™ Quadrupole-Orbitrap mass  
251 spectrometer (Thermo Fisher Scientific, United States) in positive ion mode. Data-dependent  
252 acquisition method was used for MS/MS of small molecules in the extractions. The complete  
253 MS settings were 70,000 resolution, 1e<sup>6</sup> AGC (Automatic Gain Control), 100 ms max inject  
254 time, and 100–1500 m/z. The MS/MS settings were 35,000 resolution, 1e<sup>5</sup> AGC, 100 ms max  
255 inject time, 1.0 m/z isolation window, and 30 dynamic exclusions. Three technical replicates  
256 were run for each extraction, and each technical replicate used a different HCD collision energy  
257 (25, 30, and 35, respectively).

258 Compound Discoverer™ 3.0 (Thermo Fisher Scientific, United States) software was used to  
259 analyze the LC-MS/MS data for each extraction in positive ion mode.

260 Data normalization and analysis were carried out using MetaboAnalyst 5.0  
261 ([www.metaboanalyst.ca](http://www.metaboanalyst.ca)) [43]. Data exclusion was performed for metabolites with constant  
262 values across metabolites and interquartile filtering. Missing values were mean imputed, and

263 normalization was performed. For univariate analysis, fold change and T-test values were  
264 calculated, followed by multiple testing correction based on false discovery rate (FDR). ROC-  
265 curve (receiver operating characteristic) analysis was also carried out for each metabolic  
266 feature, and 95% confidence intervals were calculated using bootstrapping with 1000  
267 permutations. Multivariate exploratory analysis was performed using principal component  
268 analysis (PCA) and orthogonal projections to latent structures discriminant analysis (OPLS-  
269 DA). Permutation testing for OPLS-DA was applied to evaluate model stability to parameter  
270 addition. Linear support vector machine (SVM) classifiers were built to predict group class  
271 using Monte-Carlo cross-validation (MCCV) and balanced subsampling. A total of six SVMs  
272 with an increasing number of metabolites (maximum 100) were compared. Model evaluation  
273 was performed using ROC curves, and biomarker identification was achieved using the feature  
274 ranking method implemented in SVM (S.2.2, Fig. S3a, b, c).

## 275 **2.4 Trace metal quantification using inductively coupled plasma mass spectrometry (ICP- 276 MS)**

277 Plasma samples of study groups were processed and subjected to ICP-MS to quantify  $^{24}\text{Mg}$ ,  
278  $^{44}\text{Ca}$ ,  $^{57}\text{Fe}$ ,  $^{63}\text{Cu}$ ,  $^{66}\text{Zn}$ ,  $^{77}\text{Se}$ ,  $^{85}\text{Rb}$ ,  $^{208}\text{Pb}$ , and  $^{39}\text{K}$ . Plasma samples (100  $\mu\text{l}$ ) were transferred to  
279 MG5 vials (Anton Paar, Graz, Austria), and  $\text{HNO}_3$  (250 $\mu\text{l}$ , 70%, #225711 Sigma Aldrich, St.  
280 Louis, Missouri, United States, with  $\geq 99.999\%$  trace metal basis) and  $\text{H}_2\text{O}_2$  (50 $\mu\text{l}$ , 30%, 231  
281 #1.07298.1000, Supelco, Inc. Bellefonte, Pennsylvania, USA) were added. Vials were sealed  
282 using sealers (#411860, Anton Paar). The vials containing the reaction mixtures were digested  
283 using a microwave digestion system (Anton Paar, Graz, Austria) ramped up to 300 W in 15  
284 min, where it was held for 10 min. The digested samples diluted using trace metal-free water  
285 (18.2  $\text{M}\Omega \times \text{cm}$ ) for inductively coupled plasma mass spectrometry (ICP-MS)  
286 analysis. Digested samples were analyzed using ICP-MS (iCAP<sup>TM</sup> TQ ICP-MS, Thermo  
287 Scientific, USA). Thermo Scientific Qtegra Intelligent Scientific Data Solution (ISDS)  
288 software was used for operating and controlling the instrument. The ICP-MS was calibrated  
289 using a multi-element standard mix (#92091, Sigma Aldrich, St. Louis, Missouri, United  
290 States) prepared in 1%  $\text{HNO}_3$  per the manufacturer's instruction. Calibration plots were  
291 prepared at 1 ppb to 5 ppm concentrations and showed  $R^2 = 0.99$ . Digested samples were  
292 aspirated using a V-grooved MicroMist DC nebulizer and spray chamber of ICP-MS using a  
293 sample capillary (0.55 mm). Samples were then passed through a quartz torch with an injector  
294 having a diameter of 2 mm. Here, plasma ionized samples passes through sample cones,  
295 followed by a skimmer cone. The experiments were conducted in KED (Kinetic energy  
296 dissociation) mode to avoid any polyatomic ion interference. During the run, the nebulizer flow  
297 was set at 1.04 l/min with a pressure of 3.20 bar. The peristaltic pump revolved clockwise at  
298 40 rpm. The quartz torch produced plasma and the exhaust was maintained at 0.49 mbar.  
299 Interface temperature was maintained at 29.98°C with a  $\text{N}_2$  flow of 14 l/min. The system's  
300 sample and skimmer cones were made of nickel with orifices of 1 mm and 0.5 mm,  
301 respectively. Between sample runs,  $\text{HNO}_3$  (1%) was pumped through the nebulizer with a  
302 wash-out time of 30 sec to remove any carryover. The complete experiment was carried out  
303 with a dwell time of 0.1s. The average of three runs for each element concentration was  
304 calculated and exported for further statistical analysis. Comparative trace element levels  
305 between study groups (HbSS, HbAS and HbAA) were calculated considering the limit of  
306 detection and dilution factors.

### 307 **2.4.1 Statistical analysis**

308 An unpaired t-test was performed using Graphpad prism 8 to identify group-specific variations  
309 and a  $p < 0.05$  was selected as significant.

310  
311  
312

### 313 3. Results

314

#### 315 3.1 Clinical characteristics of the study participants

316 In this case and control study, a total of 30 study participants belonging to SCD as case and  
317 control (sickle cell trait and healthy controls) were used for plasma ionic and RBC  
318 metabolomic profiling. The demographic and clinical characteristics of study participants are  
319 presented in Supplementary Tables S1 and S2.

320

#### 321 3.2 Sickle cell anemia is associated with an altered ionic profile

322 From the comparative plasma trace element analysis, significantly higher plasma levels of Mg  
323 ( $p < 0.0001$ ), Zn ( $p < 0.0001$ ), Ca ( $p < 0.01$ ), Pb ( $p < 0.01$ ), and K ( $p < 0.01$ ) were observed in SCD  
324 patients compared to healthy controls (Fig. 1a, c, d, e, h). Significantly lower plasma levels of  
325 Fe, Se ( $p < 0.05$ ), and Rb ( $p < 0.01$ ) were observed, indicating higher oxidative stress in SCD  
326 patients (Fig. 1b, g and i). However, Cu levels were similar between study groups (Fig. 1f).  
327 Overall, the subjects with sickle cell trait had comparable trace metal levels to the healthy  
328 controls except for Rb whose levels hovered in between the levels observed in SCD and healthy  
329 control (Fig. 1i). We found that there was a steady decrease in Rb/K levels in the SCD group  
330 compared to the healthy controls (Fig. 1j)

331

#### 332 3.3 Metabolomics profiling of RBCs of patients with SCD demonstrated significant 333 deregulation of specific metabolites compared to the healthy controls.

334 Global metabolomic profiling of RBCs from SCD patients and healthy donors yielded 442  
335 metabolite features. Principal Components Analysis (PCA) analysis of these analytes showed  
336 separate non-overlapping clusters of SCD and healthy groups. The principal components 1 and  
337 2 explained 44.2% of the total variance (Fig. 2a). A supervised OPLS-DA model was evaluated  
338 to identify significant differentially abundant metabolites between groups and validated using  
339 permutation tests (Fig. S2a). A random permutation test ( $n = 2000$ ) resulted in an interpretation  
340 rate ( $R_2$ ) and prediction ability ( $Q_2$ ) of 0.999 and 0.891, respectively (Fig. S2b). A set of 10  
341 analytes (S.2.2, Fig. S2c) qualified the variable importance in projection (VIP) scores  $> 1.0$  and  
342 were identified as important metabolites. These metabolites displayed significantly different  
343 concentrations between groups, with fold changes  $> 1.0$  or  $< 0.5$ . In the univariate analysis, 136  
344 showed differential expression (62/56; up-/down-regulated;  $FC >$ ;  $p < 0.005$ ) in SCD (Fig. 2b,  
345 Table S3 and Table S4). After false discovery rate adjustment, 18 analytes (7/10; up/down  
346 regulated) showed significant deregulation. In the RBC of SCD patients, glutathione,  
347 aminolevulinic acid, DL-2-aminooctanoic acid, D-glutamine, and amino adipic acid (Table S3)  
348 levels were significantly high. Significantly lower levels of N6,N6,N6-trimethyl-L-lysine,  
349 dihydrothymine, pyroglutamic acid, 2'-alpha-mannosyl-L-tryptophan and 2-aminoisobutyric  
350 acid were observed in the RBC of the SCD patients compared to healthy controls (Fig. 2b, 2c).  
351 Hierarchical clustering analysis was performed to identify top 25 significantly dysregulated  
352 metabolic features in SCD and healthy control (Fig. 2c). The SVM model evaluation  
353 highlighted the common metabolic features (Fig. S3c) with the OPLS-DA (Fig. S2c) and  
354 hierarchical clustering analysis (Fig. 2c), i.e., thiazolidine-4-carboxylic acid, N-[(3-exo)-8-  
355 Benzyl-8-azabicyclo[3.2.1]oct-3-yl]-2-methylpropanamide, ethyl-3-phenylpropionate,  
356 meprobamate, N-BOC hydroxylamine. Interestingly, amongst the common metabolic features,  
357 thiazolidine-4-carboxylic acid and its derivatives have been reported reduce oxidative stress  
358 induced cell death [44].

359

#### 360 3.4 Functional pathway analysis

361 The significantly dysregulated metabolites in SCD group were selected for the KEGG pathway  
362 analysis using MetaboAnalyst (<https://www.metaboanalyst.ca>). D-glutamine and D-



363 glutamate metabolism (p-value = 0.0006, Fig. S6a), aminoacyl-tRNA biosynthesis metabolism  
 364 (p-value = 0.0009), sphingolipid metabolism (p-value = 0.0009), arginine biosynthesis (p-value  
 365 = 0.00099), glycine, serine and threonine metabolism (p-value = 0.004, Fig. S6b), beta-alanine  
 366 metabolism (p<0.005), arginine and proline metabolism (p<0.007), glutathione metabolism  
 367 (p<0.009, Fig. S6c), glutathione metabolism (p<0.01), and ether lipid metabolism (p<0.012)  
 368 were significantly altered in the RBC of SCD patients compared to the control group (Fig. 2d).

369

#### 370 4. Discussion

371

372 The overwhelming significance of RBCs stems from the enormous abundance of hemoglobin.  
 373 Any alteration in structural and functional attributes of hemoglobin can translate into  
 374 irregularities in RBC functions. These irregularities can have different clinical complications

375

376

377

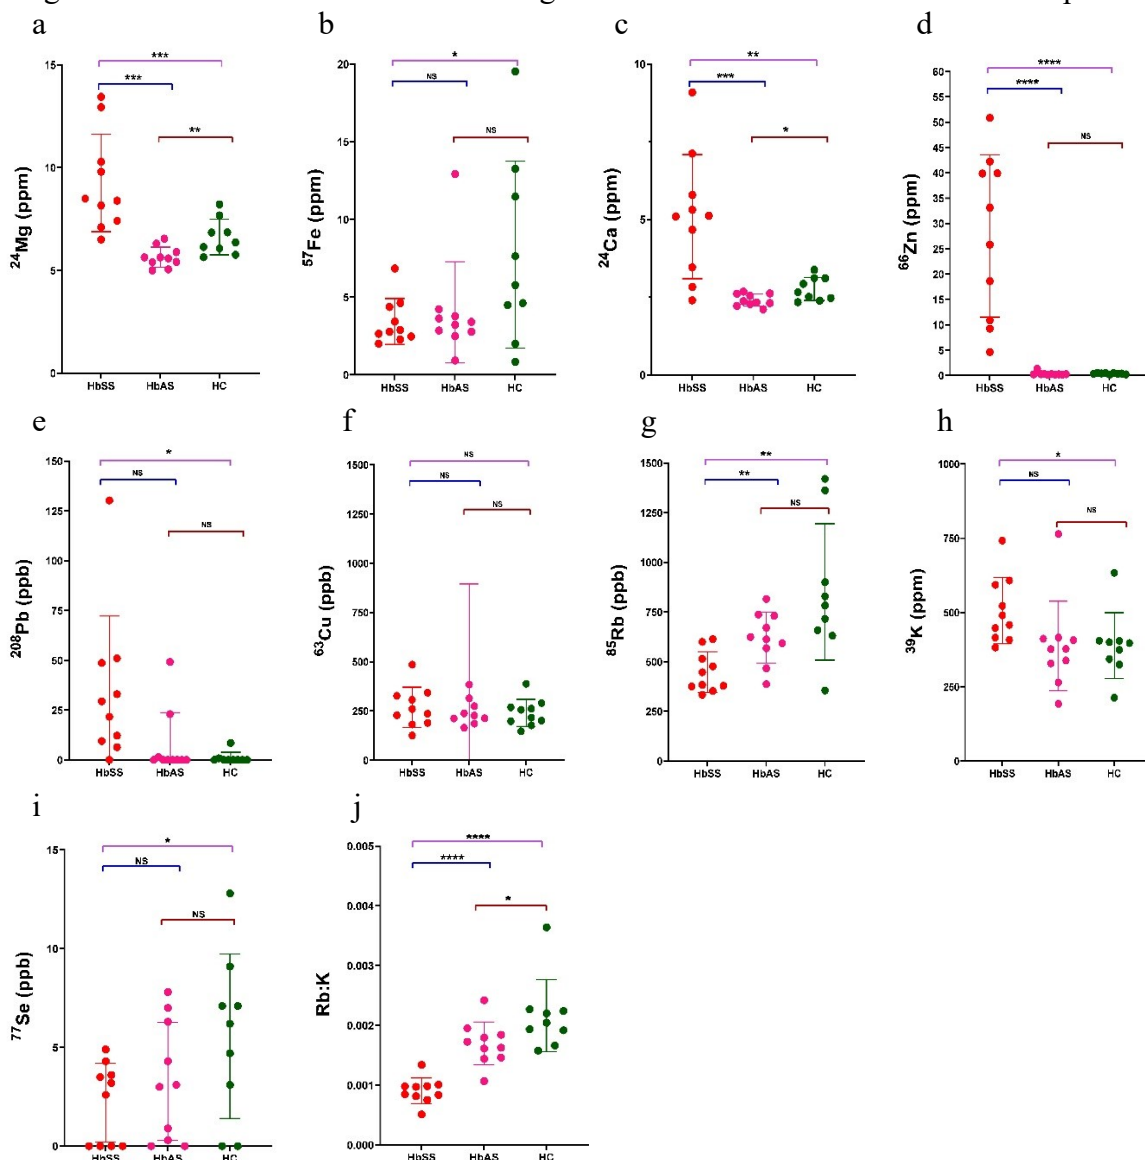

378

379

380

381 **Figure 1. Plasma trace element levels of sickle cell patient (HbSS), sickle cell trait (HbAS)**  
 382 **and healthy control (HC) and their ratio showed significant differences. a) Mg, b) Fe, c)**  
 383 **Ca, d) Zn, e) Pb, f) Cu, g) Rb, h) K, i) Se, j) Rb:K. \*p < 0.05, \*\*p < 0.01, \*\*\*p < 0.001 \*\*\*\*p**  
 384 **< 0.0001; HbSS: Sickle cell disease; HbAS: Sickle cell trait; HC: Healthy control.**

385

386 inside the human body [45-47]. The RBCs are designated as a simple model to study cellular  
 387 mechanisms due to less epigenetic, transcriptional and translational complications to regulate  
 388 the cross-talk amongst various pathways [48-50]. However, recent omics studies highlight the  
 389 existence of a complex network of cytosolic enzymes which regulate the energetics and  
 390 functioning of RBCs [51, 52]. Physical and pathological stresses can alter the metabolic  
 391 equilibrium and accelerate disease progression. Thus, an in-depth understanding is required to  
 392 deconstruct the highly interlinked stressed RBC pathophysiology [53].

393 Enhanced hemolysis observed in SCD patients might be contributing to the observed  
 394 higher plasma Mg level ( $p < 0.001$ ) [54]. This finding is in agreement with observations by  
 395 Olukoga, A. O et al. (1990) [55] which establishes a negative correlation between erythrocyte  
 396 and plasma Mg in the SCD cohort [56]. In contrast, low serum Mg levels have been reported  
 397 in SCD patients due to Mg homeostasis [57, 58].

398  
 399

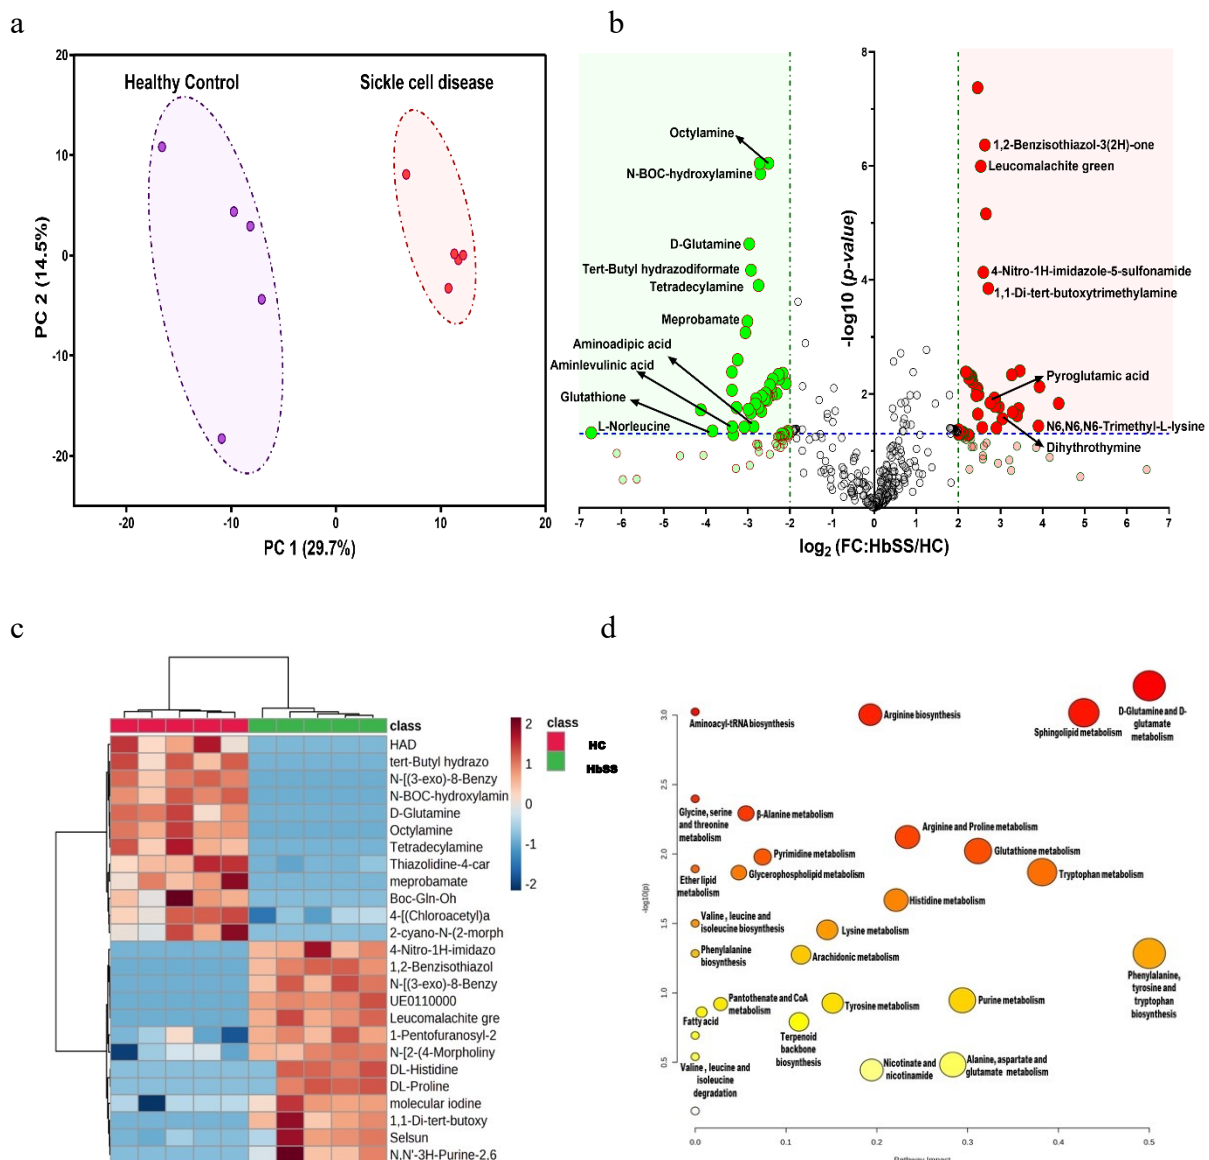

400  
 401  
 402  
 403  
 404  
 405  
 406  
 407  
 408  
 409  
 410  
 411  
 412  
 413  
 414  
 415  
 416  
 417

418 **Figure 2. Perturbed RBC metabolic fingerprint observed in sickle cell disease patients (HbSS)**  
 419 **compared to the healthy control (HC).** a) PCA score plot showed RBC metabolites (n=442) of SCD  
 420 patients cluster away from the healthy controls. b) Volcano plot highlighting the dysregulated  
 421 erythrocyte metabolites in SCD (HbSS) compared to the healthy control (HC). c) Hierarchical  
 422 Clustering representing the distribution of 25 important RBC metabolites in SCD patients and healthy

423 controls. Columns correspond to samples, and rows to individual metabolites. The color scale indicates  
424 the relative abundance of metabolites: red being the most abundant and blue the less abundant  
425 metabolites. d) Metabolic pathways altered in the RBCs of SCD patients compared to healthy controls.  
426 The pathway impact values (x-axis) represent the influencing factor of topological analysis, and the  $-\log(p)$   
427 (y-axis) represents the p-value of the pathway enrichment analysis. The vital metabolic pathways  
428 were defined as having  $-\log(p) > 2$  and pathway impact factor  $> 0.2$ .

429

430 Similarly, RBCs contain 10-15% of the total cellular pool of calcium. Sickle cells show  
431 increased Ca as compared to normal cells in the oxygenated state [59]. Malinovská V et al.  
432 (1991) reported that stress conditions increase plasma Ca levels [60]. Higher plasma Ca levels  
433 as observed in SCD patients can be attributed to frequent hemolysis due to prolonged stress in  
434 SCD patients [61]. However, in SCD an accumulation of intraerythrocytic Ca has been reported  
435 due to malfunction of  $\text{Ca}^{2+}$  transporters [33]. Higher plasma Ca levels as observed in SCD  
436 patients can be attributed to frequent hemolysis due to prolonged stress in SCD patients [62].  
437 An increased intracellular Ca concentration induces alteration to calcium-sensitive potassium  
438 ( $\text{K}^+$ ) channel protein 4 (also known as the putative Gardos channel and  $\text{K}-\text{Cl}$  cotransporter 1  
439 ( $\text{KCC1}$ ),  $\text{KCC3}$  and/or  $\text{KCC4}$  [63], resulting in potassium-efflux and decreased cell volume  
440 [64-66], which in turn increases the stiffness of RBC. Similarly, we also observed higher  
441 plasma K levels corroborating earlier reports [67-71]. Thus,  $\text{K}^+$  is an important indicator of  
442 SCD, however, its measurement to assess the severity in many pathophysiological conditions  
443 can be erroneous due to factors like pseudohyperkalemia and poses a challenge [72].

444 Another similar group I alkali metal, rubidium ( $\text{Rb}^+$ ) was significantly lower ( $p < 0.01$ )  
445 in SCD patients compared to the trait and control group. It shares similar biochemical  
446 properties and readily exchanges with  $\text{K}^+$  and thus, can be a useful proxy for  $\text{K}^+$ . Although its  
447 biological function still needs further understanding,  $^{86}\text{Rb}$ 's prominent presence was utilised to  
448 measure basal metabolic rate, establishing a correlation between its radioactive turnover and  
449  $\text{K}^+$  concentration [73]. We are the first to report a correlation between plasma Rb and  $\text{K}^+$   
450 concentration, which significantly decreased from healthy to trait and even decreased further  
451 in the SCD group. Rb may have the potential to be used as a marker to assess the severity  
452 associated with sickling. Rb has unique neurophysiological and neuroprotective properties [74-  
453 76]. Kordjazzy et al. (2015) found that mice administered with Rb showed less depression-like  
454 behaviour through changes in the hippocampus [77]. Recent clinical trials and studies have  
455 widely reported that SCD patients suffer from neuro-cognitive complications [78-80].  
456 Neurocognitive impairment have been reported in children with SCD, which affects their  
457 visuo-spatial memory (14.8%), IQ (85.4%) and copying (68.2%) [79, 81, 82]. These studies  
458 indicate that SCD can lead to the development of neuro-complications. Thus, Rb's beneficial  
459 role in improving SCD patients' neurocognitive complications can be further explored.

460 We observed significantly higher plasma lead levels in SCD compared to the trait and  
461 healthy cohort. These findings align with previous studies that have correlated BLL (Blood  
462 lead level) levels with moderate and severe anemia [83]. In addition to neurological toxicity,  
463 Pb can worsen sickle cell anemia by impairing heme synthesis and increasing the rate of red  
464 blood cell destruction [84]. Schwartz et al (1982) showed a dose-dependent increase in anemia  
465 in children with blood lead levels near  $25 \mu\text{g}/\text{dl}$  [83, 85]. A linear decrease in hemoglobin was  
466 reported in children with increased BLL (BLL  $> 30 \mu\text{g}/\text{dl}$ ) by Drossos et al (1985) [86].  
467 Although these findings indicate a relationship between Pb levels and SCD, a more detailed  
468 analysis is required to solidify these claims.

469 High plasma Zn levels of the SCD group was observed compared to trait and control  
470 group that does not corroborate with earlier reports [34, 87]. An increased iron (Fe)  
471 concentration in the intestinal lumen may antagonize the uptake of Zn [88]. Zn concentrations  
472 have been inversely correlated to Copper (Cu) levels [87, 89]. This depletion of Cu could  
473 impair iron absorption [90]. However, no such relationship was observed in our present study

474 and no significant change in Cu levels was observed across the group. On the contrary, a steady  
475 Fe increase was observed in trait and healthy group ( $p < 0.05$ ), which indicates disrupted Fe  
476 homeostasis and most often caused by excessive urinary loss of iron as reported by some  
477 studies [91, 92].

478 Selenium (Se) is an essential component of mammalian enzymes like glutathione  
479 peroxidases (GPx) [93, 94], providing antioxidant defence against ROS. Erythrocytes of Se-  
480 deficient rats failed to protect hemoglobin from oxidative damage in the presence of ascorbate  
481 or  $H_2O_2$  or glutathione [94]. Se deficiency is known to alter erythroid parameters like RBC,  
482 HCT, HGB, and MCHC ( $P < 0.05$ ) and makes erythrocytes osmotically fragile [95]. The family  
483 is involved in oxido-reduction reactions and these reactions occur in diverse tissues and  
484 physiological pathways. Se supplementation has preventive and therapeutic role in diverse  
485 disease conditions [96-100]. Plasma Se levels were highest in the healthy and lowest in the  
486 SCD group ( $p < 0.05$ ); so Se supplementation may be beneficial to SCD patients.

487

#### 488 **4.1 Metabolic insights in sickle RBCs indicate an altered Gamma-Glutamyl cycle which** 489 **fuels ATP depletion from sickle red blood cells**

490 The main oxidative damage control system in RBCs, the glutathione pathway, has been  
491 reported to be altered in HbS red blood cells [101]. There is increasing evidence that this  
492 alteration leads to oxidative stress with a negative domino effect on the pathophysiology of  
493 SCD [61]. ROS can be derived non-enzymatically (Fenton chemistry) from denatured sickle  
494 hemoglobin (Hb S) moieties and lipid peroxidation or derived enzymatically by the action of  
495 NADPH oxidase. ROS damage RBC membranes and decrease cell deformability, which  
496 contributes to the pathophysiology of SCD [102]. Plasma-free hemoglobin (Hb) and iron  
497 chelates are by-products of hemolysis that can also act as oxidants [103]. To counteract ROS,  
498 mammalian cells have antioxidant pathways involving reduced glutathione (GSH), NAD(H),  
499 NADP(H), glutamine and nitric oxide (NO), which are complex and interlinked. Glutathione  
500 exists in a reduced (GSH) and oxidized (GSSG) form. The thiol reductant, GSH, scavenges  
501 ROS such as hydrogen peroxide and lipid peroxides [103, 104]. GSH can also interact with Hb  
502 to form glutathiol-hemoglobin (G-Hb) which reduces the propensity for sickling  
503 [105]. Similarly, we observed alterations in glutathione pathway along with disruptions in  
504 glutamine/glutamate metabolism, which are the main oxidative damages control system in  
505 RBCs of HbS cells.

506 Significant disruptions in glycine, serine, and threonine metabolism with lower 5-  
507 aminolevulinate levels ( $p$ -value  $< 0.01$ ), which is a by-product of glycine, indicate lower glycine  
508 levels (Fig. 3, Fig. S6c). Chronic oxidative stress leads to increased GSSG efflux that exceeds  
509 the rate of GSH synthesis [106]. However, rapid efflux of GSSG leads to NADPH depletion,  
510 which was observed in our study. Thus, de novo GSH synthesis becomes critical in these  
511 oxidative stress conditions and needs glycine, glutamate, and cysteine in an ATP-dependent  
512 biosynthesis. Catabolism of GSH via membrane mounted gamma-glutamyl transpeptidase  
513 (GGT) followed by removal of gamma-glutamyl moiety from GSH by gamma-glutamyl  
514 transpeptidase yields cysteinyl-glycine conjugates (Cys-Gly) and g-glutamyl-amino acid (G-  
515 Glu) as products. Hydrolysis of these conjugates by ectoprotein dipeptidases (DPT) yields  
516 cysteine and glycine. The g-Glu, glycine and cysteine enter the cell through specific  
517 transporters. The g-glutamyl with an amino acid derivative enters the cell and gamma-glutamyl  
518 cyclotransferase ( $\gamma$ -GCT/GGCT) converts to 5-oxoproline and the corresponding amino acid.  
519 5-oxoprolinase (OXP) converts 5-oxoproline (pyroglutamic acid) to glutamate in a ATP  
520 dependent manner. Oxoproline is converted to a dipeptide i.e. g-glutamylcysteine by  
521 combining glutamate and cysteine by gamma-glutamylcysteine synthetase ( $\gamma$ -GCS/G-GCS) in  
522 a two-step reaction which utilizes an ATP per catalytic step. This g-glutamyl cysteine can either  
523 act as substrate for GGCT to recycle to 5-oxoproline or it can be converted to GSH by the



524 addition of glycine through GSH synthetase (GS) activity with the usage of an ATP molecule  
525 [106-108].

526 ATP production and antioxidant systems within the RBC exploit Hb-based O<sub>2</sub>-transport  
527 to respond to various physiologic and pathophysiologic stresses. RBCs produce energy through  
528 the hexose monophosphate pathway (HMP) and glycolysis, only via the Embden–Meyerhof  
529 pathway (EMP), which generates ATP [109]. The HMP route produces NADPH, which powers  
530 the thiol-based antioxidant system critical for maintaining homeostasis in the O<sub>2</sub>-rich RBC  
531 [110]. For example, O<sub>2</sub> offloading promotes glycolysis to generate both 2,3-BPG (a negative  
532 allosteric effector of Hb O<sub>2</sub> binding) and ATP. Dynamic regulation of ATP ensures the  
533 functional activity of ion pumps, cellular flexibility, drives metabolic reactions and vaso  
534 regulation/dilation under hypoxic stress (Fig. 3). A toggle between frequency of EMP and HMP  
535 is regulated by the assembly of an EMP protein complex upon the cytoplasmic domain of the  
536 band 3 membrane protein [cdB3, also known as anion exchanger 1 (AE1)] [111-118].  
537 Metabolite flux through EMP vs. HMP oscillates depending on the Hb conformation  
538 (oxygenation state) and cdB3 phosphorylation. RBC deoxygenation promotes the generation  
539 of ATP, while full oxygenation of RBCs promotes NADPH generation [109, 119]. Rogers and  
540 co-workers (2009) showed that RBC antioxidant systems fail when HMP flux is blunted by  
541 altered cdB3 protein assembly/phosphorylation caused by aberrant Hbs or hypoxia [109, 120,  
542 121].

543 SS-RBCs are characterized by elevated indices of oxidative stress and depressed ATP  
544 levels[122], as well as elevated 2,3-DPG. Recently published evidence suggests a role for  
545 pannexin 1 (Px1) in the release of ATP from RBCs due to Gi protein stimulation in SCD [123,  
546 124]. Zhang et al. (2011) showed that an elevated level of plasma adenosine plays a role in the  
547 increased concentration of DPG, which contributes to SCD pathophysiology by decreasing  
548 O<sub>2</sub> affinity, which in successive turn promotes HbS polymerization, RBC sickling, and  
549 hemolysis [125]. As a consequence, the hydrolysis of extracellular ATP and accumulation of  
550 adenosine are favoured, and signalling via adenosine receptors may promote deoxygenation of  
551 sickle Hb and in turn (HbS) polymerization and RBC sickling.

552 The higher levels of pyroglutamic acid or 5-oxoproline in SS-RBCs compared to  
553 healthy counterparts can be attributed to an anomaly in salvage pathway of GSH (Fig. S6a, b).  
554 5-oxoproline is acted upon by the 5-oxoprolinase enzyme (ATP-requiring enzyme) to yield  
555 glutamate [126]. The conversion of glutamate by the action of two consecutive ATP-dependant  
556 enzymes yields back GSH (Fig. 3). However, 5-oxoprolinase exhibited slow and inefficient  
557 enzyme activity (reaction rate of 0.45 nmol/h), which may explain the increased levels of 5-  
558 oxoproline in the cells[127]. Also, if  $\gamma$ -GCS fails to find an acceptor cysteine during its  
559 catalysis, it can autocyclize  $\gamma$ -glutamyl phosphate (intermediate product) to form 5-oxoproline  
560 [128].

561 Furthermore, a depleted pool of ATP, cysteine, and glycine due to sickle  
562 pathophysiology as discussed above can retard the activity  $\gamma$ -glutamyl cycle enzymes, i.e.,  
563 OXP,  $\gamma$ -GCS and GS[129]. Bacchawat et al., proposed a similar futile cycle involving ATP-  
564 dependant  $\gamma$ -glutamyl cycle enzymes like  $\gamma$ -GCS and 5-oxoprolinase, leading to rapid depletion  
565 of ATP in cystinosis cells per cycle [130].

566 Alternatively, we can also hypothesize an abnormal activity of GGCT enzyme that  
567 leads to the accumulation of 5-oxoproline by acting on  $\gamma$ -glutamyl-AA as a response to a  
568 decline in the concentration of cellular GSH under oxidative stress. Previous reports showed  
569 that GGCT reduces oxidative and osmotic stress in RBCs which prevents deformability  
570 prolonging their life span [131]. In various cancers, higher GGCT expression was observed  
571 and reported as a therapeutic target [132]. In SS-RBCs, a deregulated GGCT response leads to  
572 ATP depletion and also limits the availability of glycine and cysteine, which are GSH  
573 precursors [132].



## 574 5. Conclusion

575

576 In this study, we reported an altered elemental profile of plasma from sickle cell patients and  
 577 healthy controls. We observed higher levels of Mg, Zn, Ca, K, and Pb in the plasma of SCD  
 578 compared to the control groups which corroborated with frequent hemolysis, rampant  
 579 dehydration of SS-RBCs via ion loss through the Gardos channel (due to  $K^+$  loss), and anemia-  
 580 induced lead accumulation. Additionally, a steady decrease in plasma Rb/K ratio was observed  
 581 for SCD when compared to trait and healthy control. We found that compromised functioning  
 582 of  $\gamma$ -glutamyl cycle leading to high levels of oxidative stress was associated with SCD. These data  
 583 could be validated in a larger population while taking other clinical parameters into  
 584 consideration. This will be useful to gain deeper insight into the biomechanical breakdown of  
 585 SS-RBCs at the molecular level and critical for identifying novel therapeutic targets for SCD  
 586 patients.

587

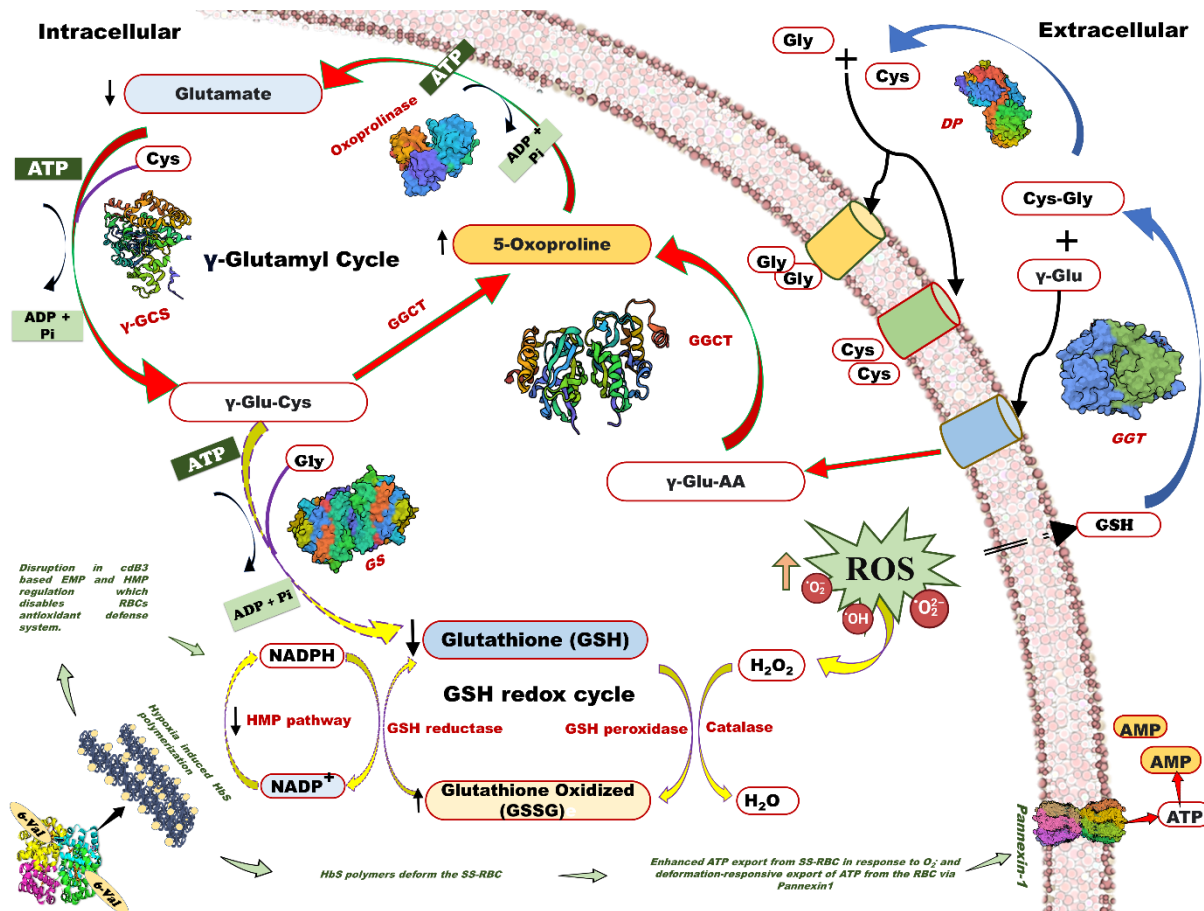

588

589

590 **Figure 3. Schematics outlining the biomechanical aberration and oxidative stress leading to**  
 591 **inoperable  $\gamma$ -glutamyl cycle in SS-RBCs.** Metabolites in shades of yellow are increased in SS-RBCs  
 592 compared to healthy. Metabolites in shades of blue are decreased in SS-RBCs compared to healthy.  
 593 Increase in color intensity indicates a higher magnitude. The solid red arrows indicate an altered gamma-  
 594 glutamyl cycle; the yellow arrow depicts altered GSH redox cycle; arrows with dashed outline entails an  
 595 obstructed metabolic reaction; green arrows/text depicts previously reported pathophysiology of SS-RBCs.  
 596 GGCT: gamma-glutamyl cyclotransferase; GGT: gamma-glutamyltranspeptidase;  $\gamma$ -GCS: glutamate  
 597 cysteine ligase; GS: glutathione synthase; OXP: 5-oxoprolinase;  $\gamma$ -Glu-Cys-Gly: glutathione; DP:  
 598 dipeptidase; HMP: hexose monophosphate pathway; EMP: Embden Meyerhof pathway; ATP:  
 599 Adenosine triphosphate; ADP: Adenosine diphosphate; AMP: Adenosine monophosphate; Pi:  
 600 phosphate.

601

602 **Funding information**

603 SK acknowledges financial support from the University of Delhi (Institution of Eminence grant  
604 IOE/FRP/LS/2020/27). SK also acknowledges the financial support from BITS Pilani, K.K. Birla Goa  
605 campus (BPGC/RIG/2022-23/09-2022/01; GOA/ACG/2022-2023/Oct/10). RKN acknowledges Core  
606 support from the ICGEB New Delhi Component and project support from Department of Biotechnology  
607 New Delhi. SB acknowledges Department of Biotechnology, Government of India for Research  
608 Fellowship. ASR is thankful to the Government of Odisha for the Biju Patnaik Research Fellowship.  
609

610 **Author contributions**

611 Shruti Bhatt: Ideated the study, processed samples, designed and performed the ionomic and  
612 metabolomic experiments, analysed and plotted data, prepared the draft of the manuscript.

613 Amit Kumar Mohapatra: Performed ionomic experiments, analysed ionomics data, helped in  
614 drafting the manuscript

615 Satyabrata Meher, Apratim Sai Rajesh and Pradip Kumar Panda: Recruitment of participants,  
616 clinical profiling, human sample collection, processing and transport

617 Ranjan Kumar Nanda and Suman Kundu: Conceived and supervised the study, analysed data,  
618 provided tools and reagents, raised funds and drafted and edited the manuscript.

619 .

620 **Conflicts of interest**

621 The authors declare no conflict of interest.

622

623 **Acknowledgement**

624 Prof. Alo Nag, Department of Biochemistry, University of Delhi South Campus, New Delhi, India, is  
625 acknowledged for administrative supervision and scientific discussion with SB. Prof. Bishnu Prasad  
626 Dash, Adjunct Professor, ICMR-Regional Medical Research Centre, Bhubaneswar, Odisha, India is  
627 acknowledged for scientific discussion with SB and ASR. Ms. Nidhi Mittal is acknowledged for  
628 scientific discussions with SB. Central Instrumentation Facility (CIF), University of Delhi South  
629 Campus, New Delhi, India, is appreciated for help with metabolomics data collection. Mr Anil Bhansali,  
630 Sai Phytochemicals, New Delhi is appreciated for inspiring the laboratory to investigate sickle cell  
631 disease. Dharmender Singh is acknowledged for miscellaneous help to the laboratory.  
632  
633  
634  
635  
636  
637  
638  
639  
640  
641  
642  
643  
644  
645  
646  
647  
648  
649  
650  
651  
652  
653  
654  
655

656 Figure Legends

657

658 **Figure 1. Plasma trace element levels of sickle cell patient (HbSS), sickle cell trait (HbAS) and**  
659 **healthy control (HC) and their ratio showed significant differences. a) Mg, b) Fe, c) Ca, d) Zn, e)**  
660 **Pb, f) Cu, g) Rb, h) K, i) Se, j) Rb:K. \*p < 0.05, \*\*p < 0.01, \*\*\*p < 0.001 \*\*\*\* p < 0.0001; HbSS:**  
661 **Sickle cell disease; HbAS: Sickle cell trait; HC: Healthy control.**

662 **Figure 2. Perturbed RBC metabolic fingerprint observed in sickle cell disease patients (HbSS)**  
663 **compared to the healthy control (HC). a) PCA score plot showed RBC metabolites (n=442) of SCD**  
664 **patients cluster away from the healthy controls. b) Volcano plot highlighting the dysregulated**  
665 **erythrocyte metabolites in SCD (HbSS) compared to the healthy control (HC). c) Hierarchical**  
666 **Clustering representing the distribution of 25 important RBC metabolites in SCD patients and healthy**  
667 **controls. Columns correspond to samples, and rows to individual metabolites. The color scale indicates**  
668 **the relative abundance of metabolites: red being the most abundant and blue the less abundant**  
669 **metabolites. d) Metabolic pathways altered in the RBCs of SCD patients compared to healthy controls.**  
670 **The pathway impact values (x-axis) represent the influencing factor of topological analysis, and the –**  
671 **log(p) (y-axis) represents the p-value of the pathway enrichment analysis. The vital metabolic pathways**  
672 **were defined as having –log(p) > 2 and pathway impact factor > 0.2.**

673

674 **Figure 3. Schematics outlining the biomechanical aberration and oxidative stress leading to**  
675 **inoperable  $\gamma$ -glutamyl cycle in SS-RBCs. Metabolites in shades of yellow are increased in SS-RBCs**  
676 **compared to healthy. Metabolites in shades of blue are decreased in SS-RBCs compared to healthy.**  
677 **Increase in color intensity indicates a higher magnitude. The solid red arrows indicate an altered**  
678 **gamma-glutamyl cycle; the yellow arrow depicts altered GSH redox cycle; arrows with dashed outline**  
679 **entails an obstructed metabolic reaction; green arrows/text depicts previously reported pathophysiology**  
680 **of SS-RBCs.**

681 GGCT: gamma-glutamyl cyclotransferase; GGT: gamma-glutamyltranspeptidase;  $\gamma$ -GCS: glutamate  
682 cysteine ligase; GS: glutathione synthase; OXP: 5-oxoprolinase;  $\gamma$ -Glu-Cys-Gly: glutathione; DP:  
683 dipeptidase; HMP: hexose monophosphate pathway; EMP: Embden Meyerhof pathway; ATP:  
684 Adenosine triphosphate; ADP: Adenosine diphosphate; AMP: Adenosine monophosphate; Pi:  
685 phosphate.

686

687

688

689

690

691

692

693

694

695

696

697

698

699

700

701

702

703

704

705

706

707

708

709

710  
711  
712  
713  
714  
715  
716  
717  
718  
719  
720  
721  
722  
723  
724  
725  
726  
727  
728  
729  
730  
731  
732  
733  
734  
735  
736  
737  
738  
739  
740  
741  
742  
743  
744  
745  
746  
747  
748  
749  
750  
751  
752  
753  
754  
755  
756  
757  
758  
759  
760

## References

- [1] L. Pauling, H.A. Itano, et al., Sickle cell anemia a molecular disease, *Science* 110(2865) (1949) 543-8.
- [2] S.A. Pereira, S. Brener, C.S. Cardoso, A.B. Proietti, Sickle Cell Disease: quality of life in patients with hemoglobin SS and SC disorders, *Rev Bras Hematol Hemoter* 35(5) (2013) 325-31.
- [3] F.B. Piel, [Sickle-cell disease: geographical distribution and population estimates], *Med Sci (Paris)* 29(11) (2013) 965-7.
- [4] F.B. Piel, M.H. Steinberg, D.C. Rees, Sickle Cell Disease, *N Engl J Med* 376(16) (2017) 1561-1573.
- [5] F.B. Piel, T.N. Williams, Subphenotypes of sickle cell disease in Africa, *Blood* 130(20) (2017) 2157-2158.
- [6] D.C. Rees, T.N. Williams, M.T. Gladwin, Sickle-cell disease, *Lancet* 376(9757) (2010) 2018-31.
- [7] M.K. Safo, O. Abdulmalik, R. Danso-Danquah, J.C. Burnett, S. Nokuri, G.S. Joshi, F.N. Musayev, T. Asakura, D.J. Abraham, Structural basis for the potent antisickling effect of a novel class of five-membered heterocyclic aldehydic compounds, *J Med Chem* 47(19) (2004) 4665-76.
- [8] M.H. Steinberg, Sickle cell anemia, the first molecular disease: overview of molecular etiology, pathophysiology, and therapeutic approaches, *ScientificWorldJournal* 8 (2008) 1295-324.
- [9] J.F. Bertles, R. Rabinowitz, J. Döbler, Hemoglobin interaction: modification of solid phase composition in the sickling phenomenon, *Science* 169(3943) (1970) 375-7.
- [10] S. Ballas, Sickle cell pain: Second edition, 2015.
- [11] S.K. Ballas, D.S. Darbari, Review/overview of pain in sickle cell disease, *Complement Ther Med* 49 (2020) 102327.
- [12] A. Sanyaolu, E. Agiri, C. Bertram, L. Brookes, J. Choudhury, D. Datt, A. Ibrahim, A. Maciejko, A. Mansfield, J. Nkrumah, M. Williams, Current modalities of sickle cell disease management, *Blood Sci* 2(4) (2020) 109-116.
- [13] P. Sundd, M.T. Gladwin, E.M. Novelli, Pathophysiology of Sickle Cell Disease, *Annu Rev Pathol* 14 (2019) 263-292.
- [14] B.P. Yawn, G.R. Buchanan, A.N. Afenyi-Annan, S.K. Ballas, K.L. Hassell, A.H. James, L. Jordan, S.M. Lanzkron, R. Lottenberg, W.J. Savage, P.J. Tanabe, R.E. Ware, M.H. Murad, J.C. Goldsmith, E. Ortiz, R. Fulwood, A. Horton, J. John-Sowah, Management of sickle cell disease: summary of the 2014 evidence-based report by expert panel members, *JAMA* 312(10) (2014) 1033-48.
- [15] H. Tran, M. Gupta, K. Gupta, Targeting novel mechanisms of pain in sickle cell disease, *Blood* 130(22) (2017) 2377-2385.
- [16] D. Lanznaster, D.R. de Assis, P. Corcia, P.F. Pradat, H. Blasco, Metabolomics Biomarkers: A Strategy Toward Therapeutics Improvement in ALS, *Front Neurol* 9 (2018) 1126.
- [17] X. Hu, M.G. Adebisi, J. Luo, K. Sun, T.T. Le, Y. Zhang, H. Wu, S. Zhao, H. Karmouty-Quintana, H. Liu, A. Huang, Y.E. Wen, O.L. Zaika, M. Mamenko, O.M. Pochynyuk, R.E. Kellems, H.K. Eltzschig, M.R. Blackburn, E.T. Walters, D. Huang, H. Hu, Y. Xia, Sustained Elevated Adenosine via ADORA2B Promotes Chronic Pain through Neuro-immune Interaction, *Cell Rep* 16(1) (2016) 106-119.
- [18] Y. Zhang, V. Berka, A. Song, K. Sun, W. Wang, W. Zhang, C. Ning, C. Li, Q. Zhang, M. Bogdanov, D.C. Alexander, M.V. Milburn, M.H. Ahmed, H. Lin, M. Idowu, J. Zhang, G.J. Kato, O.Y. Abdulmalik, W. Zhang, W. Dowhan, R.E. Kellems, P. Zhang, J. Jin, M. Safo, A.L. Tsai, H.S. Juneja, Y. Xia, Elevated sphingosine-1-phosphate promotes sickling and sickle cell disease progression, *J Clin Invest* 124(6) (2014) 2750-61.
- [19] A. Kihara, Y. Igarashi, Production and release of sphingosine 1-phosphate and the phosphorylated form of the immunomodulator FTY720, *Biochim Biophys Acta* 1781(9) (2008) 496-502.
- [20] K. Sun, Y. Zhang, A. D'Alessandro, T. Nemkov, A. Song, H. Wu, H. Liu, M. Adebisi, A. Huang, Y.E. Wen, M.V. Bogdanov, A. Vila, J. O'Brien, R.E. Kellems, W. Dowhan, A.W. Subudhi, S. Jameson-Van Houten, C.G. Julian, A.T. Lovering, M. Safo, K.C. Hansen, R.C. Roach, Y. Xia, Sphingosine-1-phosphate promotes erythrocyte glycolysis and oxygen release for adaptation to high-altitude hypoxia, *Nat Commun* 7 (2016) 12086.

- 761 [21] K. Sun, A. D'Alessandro, M.H. Ahmed, Y. Zhang, A. Song, T.P. Ko, T. Nemkov, J.A. Reisz, H. Wu, M.  
762 Adebisi, Z. Peng, J. Gong, H. Liu, A. Huang, Y.E. Wen, A.Q. Wen, V. Berka, M.V. Bogdanov, O.  
763 Abdulmalik, L. Han, A.L. Tsai, M. Idowu, H.S. Juneja, R.E. Kellems, W. Dowhan, K.C. Hansen, M.K. Safo,  
764 Y. Xia, Structural and Functional Insight of Sphingosine 1-Phosphate-Mediated Pathogenic Metabolic  
765 Reprogramming in Sick Cell Disease, *Sci Rep* 7(1) (2017) 15281.
- 766 [22] Y. Xiong, P. Yang, R.L. Proia, T. Hla, Erythrocyte-derived sphingosine 1-phosphate is essential for  
767 vascular development, *J Clin Invest* 124(11) (2014) 4823-8.
- 768 [23] H. Wu, M. Bogdanov, Y. Zhang, K. Sun, S. Zhao, A. Song, R. Luo, N.F. Parchim, H. Liu, A. Huang,  
769 M.G. Adebisi, J. Jin, D.C. Alexander, M.V. Milburn, M. Idowu, H.S. Juneja, R.E. Kellems, W. Dowhan, Y.  
770 Xia, Hypoxia-mediated impaired erythrocyte Lands' Cycle is pathogenic for sickle cell disease, *Sci Rep*  
771 6 (2016) 29637.
- 772 [24] S.P. Welch, L.J. Sim-Selley, D.E. Selley, Sphingosine-1-phosphate receptors as emerging targets for  
773 treatment of pain, *Biochem Pharmacol* 84(12) (2012) 1551-62.
- 774 [25] H. Liu, M. Adebisi, R.R. Liu, A. Song, J. Manalo, Y.E. Wen, A.Q. Wen, T. Weng, J. Ko, M. Idowu, R.E.  
775 Kellems, H.K. Eltzschig, M.R. Blackburn, H.S. Juneja, Y. Xia, Elevated ecto-5'-nucleotidase: a missing  
776 pathogenic factor and new therapeutic target for sickle cell disease, *Blood Adv* 2(15) (2018) 1957-  
777 1968.
- 778 [26] K. Sun, Y. Zhang, M.V. Bogdanov, H. Wu, A. Song, J. Li, W. Dowhan, M. Idowu, H.S. Juneja, J.G.  
779 Molina, M.R. Blackburn, R.E. Kellems, Y. Xia, Elevated adenosine signaling via adenosine A2B receptor  
780 induces normal and sickle erythrocyte sphingosine kinase 1 activity, *Blood* 125(10) (2015) 1643-52.
- 781 [27] Y. Zhang, Y. Dai, J. Wen, W. Zhang, A. Grenz, H. Sun, L. Tao, G. Lu, D.C. Alexander, M.V. Milburn,  
782 L. Carter-Dawson, D.E. Lewis, W. Zhang, H.K. Eltzschig, R.E. Kellems, M.R. Blackburn, H.S. Juneja, Y. Xia,  
783 Detrimental effects of adenosine signaling in sickle cell disease, *Nat Med* 17(1) (2011) 79-86.
- 784 [28] D. Darghouth, B. Koehl, G. Madalinski, J.F. Heilier, P. Bovee, Y. Xu, M.F. Olivier, P. Bartolucci, M.  
785 Benkerrou, S. Pissard, Y. Colin, F. Galacteros, G. Bosman, C. Junot, P.H. Romeo, Pathophysiology of  
786 sickle cell disease is mirrored by the red blood cell metabolome, *Blood* 117(6) (2011) e57-66.
- 787 [29] K.C. Dembele, T. Mintz, C. Veyrat-Durebex, F. Chabrun, S. Chupin, L. Tessier, G. Simard, D. Henrion,  
788 D. Mirebeau-Prunier, J.M. Chao de la Barca, P.L. Tharaux, P. Reynier, Metabolomic Profiling of Plasma  
789 and Erythrocytes in Sick Mice Points to Altered Nociceptive Pathways, *Cells* 9(6) (2020).
- 790 [30] K.C. Dembele, C. Veyrat-Durebex, G. Aldiouma, S. Chupin, L. Tessier, Y. Goita, M.A. Baraika, M.  
791 Diallo, B.A. Toure, C. Homedan, D. Mirebeau-Prunier, G. Simard, D. Diallo, B.M. Cisse, P. Reynier, J.M.  
792 Chao de la Barca, Sick Cell Disease: Metabolomic Profiles of Vaso-Occlusive Crisis in Plasma and  
793 Erythrocytes, *J Clin Med* 9(4) (2020).
- 794 [31] I. Subramanian, S. Verma, S. Kumar, A. Jere, K. Anamika, Multi-omics Data Integration,  
795 Interpretation, and Its Application, *Bioinform Biol Insights* 14 (2020) 1177932219899051.
- 796 [32] M.H. Antonelou, A.G. Kriebardis, I.S. Papassideri, Aging and death signalling in mature red cells:  
797 from basic science to transfusion practice, *Blood Transfus* 8 Suppl 3(Suppl 3) (2010) s39-47.
- 798 [33] A. Bogdanova, A. Makhro, J. Wang, P. Lipp, L. Kaestner, Calcium in red blood cells-a perilous  
799 balance, *Int J Mol Sci* 14(5) (2013) 9848-72.
- 800 [34] R. Hasanato, Alterations in serum levels of copper, zinc, and selenium among children with sickle  
801 cell anemia, *Turk J Med Sci* 49(5) (2019) 1287-1291.
- 802 [35] M. Khurana, E.B. Fung, E.P. Vichinsky, E.C. Theil, Dietary nonheme iron is equally bioavailable from  
803 ferritin or ferrous sulfate in thalassemia intermedia, *Pediatr Hematol Oncol* 34(8) (2017) 455-467.
- 804 [36] N.A. Sopko, H. Matsui, J.L. Hannan, D. Berkowitz, H.C. Champion, L.L. Hsu, B. Musicki, A.L. Burnett,  
805 T.J. Bivalacqua, Subacute Hemolysis in Sick Cell Mice Causes Priapism Secondary to NO Imbalance  
806 and PDE5 Dysregulation, *J Sex Med* 12(9) (2015) 1878-85.
- 807 [37] S.C. Wilschefski, M.R. Baxter, Inductively Coupled Plasma Mass Spectrometry: Introduction to  
808 Analytical Aspects, *Clin Biochem Rev* 40(3) (2019) 115-133.
- 809 [38] R. Culp-Hill, A.J. Srinivasan, S. Gehrke, R. Kamyszek, A. Ansari, N. Shah, I. Welsby, A. D'Alessandro,  
810 Effects of red blood cell (RBC) transfusion on sickle cell disease recipient plasma and RBC metabolism,  
811 *Transfusion* 58(12) (2018) 2797-2806.



- 812 [39] A. D'Alessandro, S.M. Nouraie, Y. Zhang, F. Cendali, F. Gamboni, J.A. Reisz, X. Zhang, K.W. Bartsch,  
813 M.D. Galbraith, V.R. Gordeuk, M.T. Gladwin, In vivo evaluation of the effect of sickle cell hemoglobin  
814 S, C and therapeutic transfusion on erythrocyte metabolism and cardiorenal dysfunction, *Am J*  
815 *Hematol* (2023).
- 816 [40] S.R. Goodman, B.S. Pace, K.C. Hansen, A. D'Alessandro, Y. Xia, O. Daescu, S.J. Glatt, Minireview:  
817 Multiomic candidate biomarkers for clinical manifestations of sickle cell severity: Early steps to  
818 precision medicine, *Exp Biol Med* (Maywood) 241(7) (2016) 772-81.
- 819 [41] A.L. Okwi, M. Ocaido, W. Byarugaba, C.M. Ndugwa, A. Parkes, Sickling and solubility tests and the  
820 peripheral blood film method for screening for sickle cell disease. [corrected], *S Afr Med J* 99(12)  
821 (2009) 887-91.
- 822 [42] T. Sana, S. Fischer, S.J.A.T. Clara, Maximizing metabolite extraction for comprehensive  
823 metabolomics studies of erythrocytes, (2007) 5989-7407EN.
- 824 [43] Z. Pang, G. Zhou, J. Ewald, L. Chang, O. Hacariz, N. Basu, J. Xia, Using MetaboAnalyst 5.0 for LC-  
825 HRMS spectra processing, multi-omics integration and covariate adjustment of global metabolomics  
826 data, *Nat Protoc* 17(8) (2022) 1735-1761.
- 827 [44] M.A. Rizvi, Z. Hussain, F. Ali, A. Amin, S.H. Mir, G. Rydzek, R.M. Jagtap, S.K. Pardeshi, R.A. Qadri,  
828 K. Ariga, Bioactive supra decorated thiazolidine-4-carboxylic acid derivatives attenuate cellular  
829 oxidative stress by enhancing catalase activity, *Phys Chem Chem Phys* 22(15) (2020) 7942-7951.
- 830 [45] G. Bosman, Disturbed Red Blood Cell Structure and Function: An Exploration of the Role of Red  
831 Blood Cells in Neurodegeneration, *Front Med* (Lausanne) 5 (2018) 198.
- 832 [46] E. Szczesny-Malysiak, J. Dybas, A. Blat, K. Bulat, K. Kus, M. Kaczmarska, A. Wajda, K. Malek, S.  
833 Chlopicki, K.M. Marzec, Irreversible alterations in the hemoglobin structure affect oxygen binding in  
834 human packed red blood cells, *Biochim Biophys Acta Mol Cell Res* 1867(11) (2020) 118803.
- 835 [47] G. Tomaiuolo, Biomechanical properties of red blood cells in health and disease towards  
836 microfluidics, *Biomicrofluidics* 8(5) (2014) 051501.
- 837 [48] N. Cilek, E. Ugurel, E. Goksel, O. Yalcin, Signaling mechanisms in red blood cells: A view through  
838 the protein phosphorylation and deformability, *J Cell Physiol* (2023).
- 839 [49] H. Li, G. Lykotrafitis, Erythrocyte membrane model with explicit description of the lipid bilayer  
840 and the spectrin network, *Biophys J* 107(3) (2014) 642-653.
- 841 [50] V. Pretini, M.H. Koenen, L. Kaestner, M. Fens, R.M. Schiffelers, M. Bartels, R. Van Wijk, Red Blood  
842 Cells: Chasing Interactions, *Front Physiol* 10 (2019) 945.
- 843 [51] S.L. Spitalnik, D.V. Devine, Translating red cell "omics" into new perspectives in transfusion  
844 medicine: mining the gems in the data mountains, *Transfusion* 59(1) (2019) 2-5.
- 845 [52] C. Tang, Q. Meng, K. Zhang, T. Zhan, Q. Zhao, S. Zhang, J. Zhang, Multi-omics analyses of red blood  
846 cell reveal antioxidation mechanisms associated with hemolytic toxicity of gossypol, *Oncotarget* 8(61)  
847 (2017) 103693-103709.
- 848 [53] A. Iolascon, I. Andolfo, R. Russo, Advances in understanding the pathogenesis of red cell  
849 membrane disorders, *Br J Haematol* 187(1) (2019) 13-24.
- 850 [54] M. Cascella, S. Vaqar, *Hypermagnesemia*, StatPearls, Treasure Island (FL), 2023.
- 851 [55] A.O. Olukoga, H.O. Adewoye, R.T. Erasmus, M.A. Adedoyin, Erythrocyte and plasma magnesium  
852 in sickle-cell anaemia, *East Afr Med J* 67(5) (1990) 348-54.
- 853 [56] A.O. Olukoga, R.T. Erasmus, H.O. Adewoye, Erythrocyte and plasma magnesium status in  
854 Nigerians with diabetes mellitus, *Ann Clin Biochem* 26 ( Pt 1) (1989) 74-7.
- 855 [57] C. Antwi-Boasiako, Y.A. Kusi-Mensah, C. Hayfron-Benjamin, R. Aryee, G.B. Dankwah, L.A.  
856 Kwawukume, E.O. Darkwa, Total Serum Magnesium Levels and Calcium-To-Magnesium Ratio in Sickle  
857 Cell Disease, *Medicina* (Kaunas) 55(9) (2019).
- 858 [58] O.O. Yousif, M.K. Hassan, L.M. Al-Naama, Red Blood Cell and Serum Magnesium Levels Among  
859 Children and Adolescents With Sickle Cell Anemia, *Biol Trace Elem Res* 186(2) (2018) 295-304.
- 860 [59] B.F. Cameron, P. Smariga, Calcium exchange and calcium-related effects in normal and sickle cell  
861 anemia erythrocytes, *Prog Clin Biol Res* 20 (1978) 105-22.

- 862 [60] V. Malinovska, P. Matonoha, V. D'Andrea, L. Malinovsky, A. Zechmeister, The role of calcium in  
863 the effect of stress hormones, *Cas Lek Cesk* 130(22-23) (1991) 631-4.
- 864 [61] E. Nur, B.J. Biemond, H.M. Otten, D.P. Brandjes, J.J. Schnog, C.S. Group, Oxidative stress in sickle  
865 cell disease; pathophysiology and potential implications for disease management, *Am J Hematol* 86(6)  
866 (2011) 484-9.
- 867 [62] L. Hertz, R. Huisjes, E. Llaudet-Planas, P. Petkova-Kirova, A. Makhro, J.G. Danielczok, S. Egee, M.  
868 Del Mar Manu-Pereira, R. van Wijk, J.L. Vives Corrons, A. Bogdanova, L. Kaestner, Is Increased  
869 Intracellular Calcium in Red Blood Cells a Common Component in the Molecular Mechanism Causing  
870 Anemia?, *Front Physiol* 8 (2017) 673.
- 871 [63] C. Brugnara, L. de Franceschi, S.L. Alper, Inhibition of Ca(2+)-dependent K<sup>+</sup> transport and cell  
872 dehydration in sickle erythrocytes by clotrimazole and other imidazole derivatives, *J Clin Invest* 92(1)  
873 (1993) 520-6.
- 874 [64] C. Brugnara, D.C. Tosteson, Inhibition of K transport by divalent cations in sickle erythrocytes,  
875 *Blood* 70(6) (1987) 1810-5.
- 876 [65] E. Nader, M. Romana, P. Connes, The Red Blood Cell-Inflammation Vicious Circle in Sickle Cell  
877 Disease, *Front Immunol* 11 (2020) 454.
- 878 [66] V. Barodka, J.G. Mohanty, A.K. Mustafa, L. Santhanam, A. Nyhan, A.K. Bhunia, G. Sikka, D. Nyhan,  
879 D.E. Berkowitz, J.M. Rifkind, Nitroprusside inhibits calcium-induced impairment of red blood cell  
880 deformability, *Transfusion* 54(2) (2014) 434-44.
- 881 [67] C. Antwi-Boasiako, Y.A. Kusi-Mensah, C. Hayfron-Benjamin, R. Aryee, G.B. Dankwah, K.L. Abla, E.  
882 Owusu Darkwa, F.A. Botchway, E. Sampene-Donkor, Serum Potassium, Sodium, and Chloride Levels in  
883 Sickle Cell Disease Patients and Healthy Controls: A Case-Control Study at Korle-Bu Teaching Hospital,  
884 Accra, *Biomark Insights* 14 (2019) 1177271919873889.
- 885 [68] S. Pandey, A. Sharma, S. Dahia, V. Shah, V. Sharma, R.M. Mishra, S. Pandey, R. Saxena, Biochemical  
886 indicator of sickle cell disease: preliminary report from India, *Indian J Clin Biochem* 27(2) (2012) 191-  
887 5.
- 888 [69] C.T. Noguchi, A.N. Schechter, G.P. Rodgers, Sickle cell disease pathophysiology, *Baillieres Clin*  
889 *Haematol* 6(1) (1993) 57-91.
- 890 [70] D. Manwani, P.S. Frenette, Vaso-occlusion in sickle cell disease: pathophysiology and novel  
891 targeted therapies, *Blood* 122(24) (2013) 3892-8.
- 892 [71] J.R. Aluoch, Renal and electrolyte profile in steady state sickle cell disease: observations in  
893 patients with sickle cell disease in The Netherlands, *Trop Geogr Med* 41(2) (1989) 128-32.
- 894 [72] J.R. Asirvatham, V. Moses, L. Bjornson, Errors in potassium measurement: a laboratory  
895 perspective for the clinician, *N Am J Med Sci* 5(4) (2013) 255-9.
- 896 [73] S. Tomlinson, P.D. Mathialagan, S.K. Maloney, Special K: testing the potassium link between  
897 radioactive rubidium (<sup>86</sup>Rb) turnover and metabolic rate, *J Exp Biol* 217(Pt 7) (2014) 1040-5.
- 898 [74] H.L. Meltzer, R.M. Taylor, S.R. Platmann, R.R. Fieve, Rubidium: a potential modifier of affect and  
899 behaviour, *Nature* 223(5203) (1969) 321-2.
- 900 [75] N. Rahimi, M. Hassanipour, F. Yarmohammadi, H. Faghir-Ghanesefat, N. Pourshadi, E.  
901 Bahramnejad, A.R. Dehpour, Nitric oxide and glutamate are contributors of anti-seizure activity of  
902 rubidium chloride: A comparison with lithium, *Neurosci Lett* 708 (2019) 134349.
- 903 [76] L. Xiao, G. Zan, J. Qin, X. Wei, G. Lu, X. Li, H. Zhang, Y. Zou, L. Yang, M. He, Z. Zhang, X. Yang,  
904 Combined exposure to multiple metals and cognitive function in older adults, *Ecotoxicol Environ Saf*  
905 222 (2021) 112465.
- 906 [77] N. Kordjazy, A. Haj-Mirzaian, S. Amiri, S. Ostadhadi, M. Kordjazy, M. Sharifzadeh, A.R. Dehpour,  
907 Elevated level of nitric oxide mediates the anti-depressant effect of rubidium chloride in mice, *Eur J*  
908 *Pharmacol* 762 (2015) 411-8.
- 909 [78] S. Martin, M.C. Roderick, C. Abel, P. Wolters, M.A. Toledo-Tamula, C. Fitzhugh, M. Hsieh, J. Tisdale,  
910 Neurocognitive functioning in symptomatic adults with sickle cell disease: A description and  
911 comparison with unaffected siblings, *Neuropsychol Rehabil* 30(9) (2020) 1666-1681.

- 912 [79] C.T. Hijmans, K. Fijnvandraat, M.A. Grootenhuys, N. van Geloven, H. Heijboer, M. Peters, J.  
913 Oosterlaan, Neurocognitive deficits in children with sickle cell disease: a comprehensive profile,  
914 *Pediatr Blood Cancer* 56(5) (2011) 783-8.
- 915 [80] S.K. Ballas, Neurocognitive complications of sickle cell anemia in adults, *JAMA* 303(18) (2010)  
916 1862-3.
- 917 [81] L.O. Matondo, E. Kija, K.P. Manji, Neurocognitive Functioning among Children with Sickle Cell  
918 Anemia Attending SCA Clinic at MNH, Dar es Salaam, Tanzania, *Neurol Res Int* 2020 (2020) 3636547.
- 919 [82] N.S. Green, D. Munube, P. Bangirana, L.R. Buluma, B. Kebirungi, R. Opoka, E. Mupere, P. Kasirye,  
920 S. Kiguli, A. Birabwa, M.S. Kawooya, S.K. Lubowa, R. Sekibira, E. Kayongo, H. Hume, M. Elkind, W. Peng,  
921 G. Li, C. Rosano, P. LaRussa, F.J. Minja, A. Boehme, R. Idro, Burden of neurological and neurocognitive  
922 impairment in pediatric sickle cell anemia in Uganda (BRAIN SAFE): a cross-sectional study, *BMC*  
923 *Pediatr* 19(1) (2019) 381.
- 924 [83] A.A. Hegazy, M.M. Zaher, M.A. Abd El-Hafez, A.A. Morsy, R.A. Saleh, Relation between anemia  
925 and blood levels of lead, copper, zinc and iron among children, *BMC Res Notes* 3 (2010) 133.
- 926 [84] M.M. Lubran, Lead toxicity and heme biosynthesis, *Ann Clin Lab Sci* 10(5) (1980) 402-13.
- 927 [85] J. Schwartz, P.J. Landrigan, E.L. Baker, Jr., W.A. Orenstein, I.H. von Lindern, Lead-induced anemia:  
928 dose-response relationships and evidence for a threshold, *Am J Public Health* 80(2) (1990) 165-8.
- 929 [86] C.G. Drossos, K.T. Mavroidis, Z. Papadopoulou-Daifotis, D.N. Michalodimitrakis, L.X. Salamalikis,  
930 A.K. Gounaris, D.D. Varonos, Environmental lead pollution in Greece, *Am Ind Hyg Assoc J* 43(10) (1982)  
931 796-8.
- 932 [87] I.H. Elkhidir, S.S. Ali, W.K. Ali, H.R. Madani, R.A. Basheir, R.M. Altayeb, R.H.S. Shazali, S.  
933 Fadlelmoula, W.M. Eltayeb, Z.I. Omar, M. Elnil, S.O.O. Mohamed, Zinc, Magnesium, and Copper Levels  
934 in Patients with Sickle Cell Disease: A Systematic Review and Meta-analysis, *Avicenna J Med* 12(2)  
935 (2022) 45-53.
- 936 [88] A. Ece, B.S. Uyanik, A. Iscan, P. Ertan, M.R. Yigitoglu, Increased serum copper and decreased serum  
937 zinc levels in children with iron deficiency anemia, *Biol Trace Elem Res* 59(1-3) (1997) 31-9.
- 938 [89] S. Turgut, A. Polat, M. Inan, G. Turgut, G. Emmungil, M. Bican, T.Y. Karakus, O. Genc, Interaction  
939 between anemia and blood levels of iron, zinc, copper, cadmium and lead in children, *Indian J Pediatr*  
940 74(9) (2007) 827-30.
- 941 [90] I.J. Newhouse, D.B. Clement, C. Lai, Effects of iron supplementation and discontinuation on serum  
942 copper, zinc, calcium, and magnesium levels in women, *Med Sci Sports Exerc* 25(5) (1993) 562-71.
- 943 [91] H.C. Kim, N.P. Dugan, J.H. Silber, M.B. Martin, E. Schwartz, K. Ohene-Frempong, A.R. Cohen,  
944 Erythrocytapheresis therapy to reduce iron overload in chronically transfused patients with sickle cell  
945 disease, *Blood* 83(4) (1994) 1136-42.
- 946 [92] K.R. Rao, A.R. Patel, P. McGinnis, M.K. Patel, Iron stores in adults with sickle cell anemia, *J Lab Clin*  
947 *Med* 103(5) (1984) 792-7.
- 948 [93] L. Flohe, W.A. Gunzler, H.H. Schock, Glutathione peroxidase: a selenoenzyme, *FEBS Lett* 32(1)  
949 (1973) 132-4.
- 950 [94] J.T. Rotruck, A.L. Pope, H.E. Ganther, A.B. Swanson, D.G. Hafeman, W.G. Hoekstra, Selenium:  
951 biochemical role as a component of glutathione peroxidase, *Science* 179(4073) (1973) 588-90.
- 952 [95] S. Li, W. Sun, K. Zhang, J. Zhu, X. Jia, X. Guo, Q. Zhao, C. Tang, J. Yin, J. Zhang, Selenium deficiency  
953 induces spleen pathological changes in pigs by decreasing selenoprotein expression, evoking oxidative  
954 stress, and activating inflammation and apoptosis, *J Anim Sci Biotechnol* 12(1) (2021) 65.
- 955 [96] G.F. Combs, Jr., W.P. Gray, Chemopreventive agents: selenium, *Pharmacol Ther* 79(3) (1998) 179-  
956 92.
- 957 [97] R. Irons, B.A. Carlson, D.L. Hatfield, C.D. Davis, Both selenoproteins and low molecular weight  
958 selenocompounds reduce colon cancer risk in mice with genetically impaired selenoprotein  
959 expression, *J Nutr* 136(5) (2006) 1311-7.
- 960 [98] R. Scott, A. MacPherson, R.W. Yates, B. Hussain, J. Dixon, The effect of oral selenium  
961 supplementation on human sperm motility, *Br J Urol* 82(1) (1998) 76-80.

- 962 [99] M.P. Look, J.K. Rockstroh, G.S. Rao, K.A. Kreuzer, S. Barton, H. Lemoch, T. Sudhop, J. Hoch, K.  
963 Stockinger, U. Spengler, T. Sauerbruch, Serum selenium, plasma glutathione (GSH) and erythrocyte  
964 glutathione peroxidase (GSH-Px)-levels in asymptomatic versus symptomatic human  
965 immunodeficiency virus-1 (HIV-1)-infection, *Eur J Clin Nutr* 51(4) (1997) 266-72.
- 966 [100] L. Kiremidjian-Schumacher, M. Roy, Effect of selenium on the immunocompetence of patients  
967 with head and neck cancer and on adoptive immunotherapy of early and established lesions,  
968 *Biofactors* 14(1-4) (2001) 161-8.
- 969 [101] C.R. Morris, J.H. Suh, W. Hagar, S. Larkin, D.A. Bland, M.H. Steinberg, E.P. Vichinsky, M.  
970 Shigenaga, B. Ames, F.A. Kuypers, E.S. Klings, Erythrocyte glutamine depletion, altered redox  
971 environment, and pulmonary hypertension in sickle cell disease, *Blood* 111(1) (2008) 402-10.
- 972 [102] S.R. Goodman, The irreversibly sickled cell: a perspective, *Cell Mol Biol (Noisy-le-grand)* 50(1)  
973 (2004) 53-8.
- 974 [103] M. Aslan, D. Thornley-Brown, B.A. Freeman, Reactive species in sickle cell disease, *Ann N Y Acad*  
975 *Sci* 899 (2000) 375-91.
- 976 [104] F.Q. Schafer, G.R. Buettner, Redox environment of the cell as viewed through the redox state of  
977 the glutathione disulfide/glutathione couple, *Free Radic Biol Med* 30(11) (2001) 1191-212.
- 978 [105] M.C. Garel, C. Domenget, J. Caburi-Martin, C. Prehu, F. Galacteros, Y. Beuzard, Covalent binding  
979 of glutathione to hemoglobin. I. Inhibition of hemoglobin S polymerization, *J Biol Chem* 261(31) (1986)  
980 14704-9.
- 981 [106] M. Reid, A. Badaloo, T. Forrester, F. Jahoor, In vivo rates of erythrocyte glutathione synthesis in  
982 adults with sickle cell disease, *Am J Physiol Endocrinol Metab* 291(1) (2006) E73-9.
- 983 [107] R. Franco, O.J. Schoneveld, A. Pappa, M.I. Panayiotidis, The central role of glutathione in the  
984 pathophysiology of human diseases, *Arch Physiol Biochem* 113(4-5) (2007) 234-58.
- 985 [108] J.E. Snoke, K. Bloch, Studies on the mechanism of action of glutathione synthetase, *J Biol Chem*  
986 213(2) (1955) 825-35.
- 987 [109] S.C. Rogers, A. Said, D. Corcuera, D. McLaughlin, P. Kell, A. Doctor, Hypoxia limits antioxidant  
988 capacity in red blood cells by altering glycolytic pathway dominance, *FASEB J* 23(9) (2009) 3159-70.
- 989 [110] W.G. Siems, O. Sommerburg, T. Grune, Erythrocyte free radical and energy metabolism, *Clin*  
990 *Nephrol* 53(1 Suppl) (2000) S9-17.
- 991 [111] P.S. Low, P. Rathinavelu, M.L. Harrison, Regulation of glycolysis via reversible enzyme binding to  
992 the membrane protein, band 3, *J Biol Chem* 268(20) (1993) 14627-31.
- 993 [112] I. Messana, M. Orlando, L. Cassiano, L. Pennacchietti, C. Zuppi, M. Castagnola, B. Giardina,  
994 Human erythrocyte metabolism is modulated by the O<sub>2</sub>-linked transition of hemoglobin, *FEBS Lett*  
995 390(1) (1996) 25-8.
- 996 [113] D. Sterling, R.A. Reithmeier, J.R. Casey, A transport metabolon. Functional interaction of carbonic  
997 anhydrase II and chloride/bicarbonate exchangers, *J Biol Chem* 276(51) (2001) 47886-94.
- 998 [114] L.J. Bruce, R. Beckmann, M.L. Ribeiro, L.L. Peters, J.A. Chasis, J. Delaunay, N. Mohandas, D.J.  
999 Anstee, M.J. Tanner, A band 3-based macrocomplex of integral and peripheral proteins in the RBC  
1000 membrane, *Blood* 101(10) (2003) 4180-8.
- 1001 [115] N.N. Barvitenko, N.C. Adragna, R.E. Weber, Erythrocyte signal transduction pathways, their  
1002 oxygenation dependence and functional significance, *Cell Physiol Biochem* 15(1-4) (2005) 1-18.
- 1003 [116] M.E. Campanella, H. Chu, P.S. Low, Assembly and regulation of a glycolytic enzyme complex on  
1004 the human erythrocyte membrane, *Proc Natl Acad Sci U S A* 102(7) (2005) 2402-7.
- 1005 [117] H. Chu, P.S. Low, Mapping of glycolytic enzyme-binding sites on human erythrocyte band 3,  
1006 *Biochem J* 400(1) (2006) 143-51.
- 1007 [118] H. Chu, A. Breite, P. Ciruolo, R.S. Franco, P.S. Low, Characterization of the deoxyhemoglobin  
1008 binding site on human erythrocyte band 3: implications for O<sub>2</sub> regulation of erythrocyte properties,  
1009 *Blood* 111(2) (2008) 932-8.
- 1010 [119] B.S. Kirby, G. Hanna, H.C. Hendargo, T.J. McMahan, Restoration of intracellular ATP production  
1011 in banked red blood cells improves inducible ATP export and suppresses RBC-endothelial adhesion,  
1012 *Am J Physiol Heart Circ Physiol* 307(12) (2014) H1737-44.



- 1013 [120] S.C. Rogers, J.G. Ross, A. d'Avignon, L.B. Gibbons, V. Gazit, M.N. Hassan, D. McLaughlin, S. Griffin,  
1014 T. Neumayr, M. Debaun, M.R. DeBaun, A. Doctor, Sickle hemoglobin disturbs normal coupling among  
1015 erythrocyte O<sub>2</sub> content, glycolysis, and antioxidant capacity, *Blood* 121(9) (2013) 1651-62.
- 1016 [121] E. Ferru, K. Giger, A. Pantaleo, E. Campanella, J. Grey, K. Ritchie, R. Vono, F. Turrini, P.S. Low,  
1017 Regulation of membrane-cytoskeletal interactions by tyrosine phosphorylation of erythrocyte band 3,  
1018 *Blood* 117(22) (2011) 5998-6006.
- 1019 [122] R.L. Sabina, N.J. Wandersee, C.A. Hillery, Ca<sup>2+</sup>-CaM activation of AMP deaminase contributes to  
1020 adenine nucleotide dysregulation and phosphatidylserine externalization in human sickle  
1021 erythrocytes, *Br J Haematol* 144(3) (2009) 434-45.
- 1022 [123] M.F. Leal Denis, J.J. Incicco, M.V. Espelt, S.V. Verstraeten, O.P. Pignataro, E.R. Lazarowski, P.J.  
1023 Schwarzbaum, Kinetics of extracellular ATP in mastoparan 7-activated human erythrocytes, *Biochim*  
1024 *Biophys Acta* 1830(10) (2013) 4692-707.
- 1025 [124] B.S. Kirby, M.A. Sparks, E.R. Lazarowski, D.A. Lopez Domowicz, H. Zhu, T.J. McMahon, Pannexin  
1026 1 channels control the hemodynamic response to hypoxia by regulating O<sub>2</sub>-sensitive extracellular  
1027 ATP in blood, *Am J Physiol Heart Circ Physiol* 320(3) (2021) H1055-H1065.
- 1028 [125] H. Zhu, R. Zennadi, B.X. Xu, J.P. Eu, J.A. Torok, M.J. Telen, T.J. McMahon, Impaired adenosine-5'-  
1029 triphosphate release from red blood cells promotes their adhesion to endothelial cells: a mechanism  
1030 of hypoxemia after transfusion, *Crit Care Med* 39(11) (2011) 2478-86.
- 1031 [126] P. Van der Werf, M. Orłowski, A. Meister, Enzymatic conversion of 5-oxo-L-proline (L-pyrrolidone  
1032 carboxylate) to L-glutamate coupled with cleavage of adenosine triphosphate to adenosine  
1033 diphosphate, a reaction in the -glutamyl cycle, *Proc Natl Acad Sci U S A* 68(12) (1971) 2982-5.
- 1034 [127] M. Watanabe, M. Kusano, A. Oikawa, A. Fukushima, M. Noji, K. Saito, Physiological roles of the  
1035 beta-substituted alanine synthase gene family in Arabidopsis, *Plant Physiol* 146(1) (2008) 310-20.
- 1036 [128] J.J. Abbott, J. Pei, J.L. Ford, Y. Qi, V.N. Grishin, L.A. Pitcher, M.A. Phillips, N.V. Grishin, Structure  
1037 prediction and active site analysis of the metal binding determinants in gamma -glutamylcysteine  
1038 synthetase, *J Biol Chem* 276(45) (2001) 42099-107.
- 1039 [129] P.G. Richman, A. Meister, Regulation of gamma-glutamyl-cysteine synthetase by nonallosteric  
1040 feedback inhibition by glutathione, *J Biol Chem* 250(4) (1975) 1422-6.
- 1041 [130] A.K. Bachhawat, S. Yadav, The glutathione cycle: Glutathione metabolism beyond the gamma-  
1042 glutamyl cycle, *IUBMB Life* 70(7) (2018) 585-592.
- 1043 [131] Z. He, X. Sun, S. Wang, D. Bai, X. Zhao, Y. Han, P. Hao, X.S. Liu, Ggct (gamma-glutamyl  
1044 cyclotransferase) plays an important role in erythrocyte antioxidant defense and red blood cell  
1045 survival, *Br J Haematol* 195(2) (2021) 267-275.
- 1046 [132] S. Kageyama, E. Hanada, H. Ii, K. Tomita, T. Yoshiki, A. Kawauchi, Gamma-  
1047 Glutamylcyclotransferase: A Novel Target Molecule for Cancer Diagnosis and Treatment, *Biomed Res*  
1048 *Int* 2015 (2015) 345219.

1049  
1050  
1051  
1052  
1053  
1054  
1055  
1056  
1057  
1058  
1059  
1060  
1061  
1062  
1063  
1064  
1065



1066 **List of Abbreviation**

|      |                                                                            |
|------|----------------------------------------------------------------------------|
| 1067 |                                                                            |
| 1068 | SCD, Sickle cell disease                                                   |
| 1069 | ICP-MS, Inductively coupled plasma mass spectrometry                       |
| 1070 | LC-MS, Liquid chromatography-mass spectrometry                             |
| 1071 | RBC, Red blood cell                                                        |
| 1072 | SS-RBCs, sickle shaped RBCs (SS-RBCs)                                      |
| 1073 | WHO, World health organisation                                             |
| 1074 | VOC, Vaso-occlusive crisis                                                 |
| 1075 | Hb, hemoglobin                                                             |
| 1076 | HbA, adult hemoglobin                                                      |
| 1077 | HbS, sickle cell hemoglobin                                                |
| 1078 | HbF, Fetal hemoglobin                                                      |
| 1079 | VOC, Vaso-Occlusive crisis                                                 |
| 1080 | QoL, quality of life                                                       |
| 1081 | HSCT, hematopoietic stem cell transplantation                              |
| 1082 | O <sub>2</sub> , Oxygen                                                    |
| 1083 | HbS-O <sub>2</sub> , Oxygenated sickle hemoglobin                          |
| 1084 | p50, the pressure at which hemoglobin is 50% saturated                     |
| 1085 | ROS, reactive oxygen species                                               |
| 1086 | pO <sub>2</sub> , partial pressure of oxygen                               |
| 1087 | Tg, Transgenic                                                             |
| 1088 | ADORA2B, Adenosine A2b Receptor                                            |
| 1089 | S1P, sphingosine-1-phosphate (S1P)                                         |
| 1090 | EMP, Embden Meyerhoff pathway                                              |
| 1091 | HMP, Hexose monophosphate pathway                                          |
| 1092 | 2, 3-DPG, 2,3 Diphosphoglyceric Acid                                       |
| 1093 | 2, 3-BPG, 2, 3 Bisphosphoglyceric acid                                     |
| 1094 | S1PR1, S1P receptor 1                                                      |
| 1095 | SphK1, Sphingosine Kinase-1                                                |
| 1096 | ADA, Adenosine deaminase deficiency                                        |
| 1097 | PEG-ADA, Polyethylene glycol-modified adenosine deaminase                  |
| 1098 | CD73, ecto-5'-nucleotidase                                                 |
| 1099 | CAR, Central African Republic (BAN or CAR)                                 |
| 1100 | CAM, Cameroon                                                              |
| 1101 | BEN, Benin                                                                 |
| 1102 | SEN, Senegal                                                               |
| 1103 | ARB/AI, Arab-Indian                                                        |
| 1104 | HbSS, Homozygous sickle cell disease/Sickle cell disease                   |
| 1105 | HbAS, Hetrozygous sickle cell trait/ Sickle cell trait                     |
| 1106 | HbAA, Homozygous normal/ Healthy control                                   |
| 1107 | HC, Healthy control                                                        |
| 1108 | CBC, Complete blood count                                                  |
| 1109 | PCR, Polymerase chain reaction                                             |
| 1110 | HPLC, High performance liquid chromatography                               |
| 1111 | HCD, Higher-energy C-trap dissociation                                     |
| 1112 | OPLS-DA, orthogonal projections to latent structures discriminant analysis |
| 1113 | FDR, false discovery rate                                                  |
| 1114 | PCA, principal component analysis                                          |
| 1115 | SVM, Linear support vector machine                                         |

1116 MCCV, Monte-Carlo cross-validation  
1117 ROC, receiver operating characteristic  
1118 AUROC, Area under ROC  
1119 H<sub>2</sub>O<sub>2</sub>, Hydrogen peroxide  
1120 HNO<sub>3</sub>, Nitric acid  
1121 N<sub>2</sub>, Nitrogen  
1122 <sup>24</sup>Mg, Magnesium  
1123 <sup>44</sup>Ca, Calcium  
1124 <sup>57</sup>Fe, Iron  
1125 <sup>63</sup>Cu, Copper  
1126 <sup>66</sup>Zn, Zinc  
1127 <sup>77</sup>Se, Selenium  
1128 <sup>85</sup>Rb, Rubidium  
1129 <sup>208</sup>Pb, Lead  
1130 <sup>39</sup>K, Potassium  
1131 Hb-O<sub>2</sub>, oxyhemoglobin  
1132 KCC1/3/4, K-Cl co-transporter  
1133 IQ, Intelligent quotient,  
1134 BLL, Blood lead level  
1135 HCT, Hematocrit  
1136 HGB, Hemoglobin (g/dl)  
1137 MCHC, Mean corpuscular hemoglobin concentration  
1138 NADPH, Nicotinamide adenine dinucleotide phosphate  
1139 GSH, reduced glutathione  
1140 GSSG, oxidized (GSSG)  
1141 G-Hb, glutathiol-hemoglobin  
1142 DPT, dipeptidases (DPT)  
1143 GGCS, gamma-glutamylcysteine synthetase (G-GCS)  
1144 γ-GCT/GGCT, gamma-glutamyl cyclotransferase (G-GCT)  
1145 OXP, oxoprolinase  
1146 GGT, gamma-glutamyl transpeptidase  
1147 ATP, Adenosine triphosphate  
1148 cdB3, Band 3  
1149 γ-GCS/GGCS, gamma-glutamylcysteine synthetase  
1150 GS, GSH sythetase  
1151  
1152  
1153  
1154  
1155  
1156  
1157  
1158  
1159  
1160  
1161  
1162  
1163  
1164  
1165

1166  
1167  
1168  
1169  
1170  
1171  
1172  
1173  
1174  
1175  
1176  
1177  
1178  
1179  
1180  
1181  
1182
